# Supplementary material for: Enlightening the Taxonomy Darkness of Human Gut Microbiomes With a Cultured Biobank
Source: Research Square preprint supplement (doi:10.21203/rs.3.rs-168279/v1), 2021-02-08
Supplement: Supplementary file 1 [file 90a14ca0832347c750f231e6.xlsx]

## Sheet: representatives of 401 species
Table S7. The taxonomic and 16S rRNA gene information of hGMB
Taxon Number	Phylum	Order	Class	Family	Species	Type/Representative strains	CGMCC accession numbers of strains	NMDC accessions of 16S rRNA gene sequence	Genbank accessions of 16S rRNA gene sequences	Representatives of "Most wanted" taxa	Is newly-denominated taxon?
Taxon_1	Firmicutes	Clostridia	Clostridiales	Yeguiaceae	Yeguia hominis	NSJ-40	1.32813	NMDCN0000101	MT905124		Yes
Taxon_2	Firmicutes	Clostridia	Clostridiales	Christensenellaceae	Luoshenia tenuis	NSJ-44	1.32817	NMDCN0000102	MT905125		Yes
Taxon_3	Firmicutes	Clostridia	Clostridiales	Feifaniaceae	Feifania hominis	BX7	1.32862	NMDCN0000103	MT905126		Yes
Taxon_4	Firmicutes	Clostridia	Clostridiales	Bianqueaceae	Bianquea renquensis	NSJ-32	1.32805	NMDCN0000104	MT905127		Yes
Taxon_5	Firmicutes	Clostridia	Clostridiales	Christensenellaceae	Gehongia tenuis	NSJ-53	1.32829	NMDCN0000105	MT905128		Yes
Taxon_6	Firmicutes	Clostridia	Clostridiales	Christensenellaceae	Guopingia tenuis	NSJ-63	1.32839	NMDCN0000106	MT905129		Yes
Taxon_7	Firmicutes	Clostridia	Clostridiales	Clostridiaceae	Ligaoa zhengdingensis	NSJ-31	1.32804	NMDCN0000107	MT905130		Yes
Taxon_8	Firmicutes	Clostridia	Clostridiales	Clostridiaceae	Congzhengia minquanensis	H8	1.32875	NMDCN0000108	MT905131		Yes
Taxon_9	Firmicutes	Clostridia	Clostridiales	Clostridiaceae	Fumia xinanensis	NSJ-33	1.32806	NMDCN0000109	MT905132		Yes
Taxon_10	Firmicutes	Clostridia	Clostridiales	Lachnospiraceae	Wujia chipingensis	NSJ-4	1.52560	NMDCN000010A	MT905133		Yes
Taxon_11	Firmicutes	Clostridia	Clostridiales	Lachnospiraceae	Simiaoa sunii	NSJ-8	1.52840	NMDCN000010B	MT905134		Yes
Taxon_12	Firmicutes	Clostridia	Clostridiales	Lachnospiraceae	Simiaoa hominis	H15	1.32863	NMDCN000010C	MT905135		Yes
Taxon_13	Firmicutes	Clostridia	Clostridiales	Lachnospiraceae	Jutongia hominis	BX3	1.32876	NMDCN000010D	MT905136		Yes
Taxon_14	Firmicutes	Clostridia	Clostridiales	Lachnospiraceae	Jutongia huaianensis	NSJ-37	1.32810	NMDCN000010E	MT905137		Yes
Taxon_15	Firmicutes	Clostridia	Clostridiales	Lachnospiraceae	Qiania dongpingensis	NSJ-38	1.32811	NMDCN000010F	MT905138		Yes
Taxon_16	Firmicutes	Clostridia	Clostridiales	Lachnospiraceae	Zhenhengia yiwuensis	NSJ-12	1.32465	NMDCN000010G	MT905139		Yes
Taxon_17	Firmicutes	Clostridia	Clostridiales	Lachnospiraceae	Jingyaoa shaoxingensis	NSJ-46	1.32819	NMDCN000010H	MT905140		Yes
Taxon_18	Firmicutes	Clostridia	Clostridiales	Lachnospiraceae	Wansuia hejianensis	NSJ-29	1.32802	NMDCN000010I	MT905141		Yes
Taxon_19	Firmicutes	Clostridia	Clostridiales	Mogibacterium	Zhenpiania hominis	BX12	1.32877	NMDCN000010J	MT905142		Yes
Taxon_20	Firmicutes	Clostridia	Clostridiales	Mogibacterium	Lentihominibacter faecis	BX16	1.32878	NMDCN000010K	MT905143		Yes
Taxon_21	Firmicutes	Clostridia	Clostridiales	Mogibacterium	Lentihominibacter hominis	NSJ-24	1.32874	NMDCN000010L	MT905144		Yes
Taxon_22	Firmicutes	Clostridia	Clostridiales	Oscillospiraceae	Yanshouia hominis	BX1	1.32879	NMDCN000010M	MT905145		Yes
Taxon_23	Firmicutes	Clostridia	Clostridiales	Oscillospiraceae	Shuzhengia hominis	BX18	1.32880	NMDCN000010N	MT905146		Yes
Taxon_24	Firmicutes	Clostridia	Clostridiales	Oscillospiraceae	Anaerofilum hominis	BX8	1.32881	NMDCN000010O	MT905147		Yes
Taxon_25	Firmicutes	Clostridia	Clostridiales	Oscillospiraceae	Zongyangia hominis	NSJ-54	1.32830	NMDCN000010P	MT905148		Yes
Taxon_26	Firmicutes	Clostridia	Clostridiales	Oscillospiraceae	Youxingia wuxianensis	NSJ-64	1.32840	NMDCN000010Q	MT905149		Yes
Taxon_27	Firmicutes	Clostridia	Clostridiales	Oscillospiraceae	Qingrenia yutianensis	NSJ-50	1.32823	NMDCN000010R	MT905150		Yes
Taxon_28	Firmicutes	Clostridia	Clostridiales	Oscillospiraceae	Jilunia laotingensis	N12	1.32860	NMDCN000010S	MT905151		Yes
Taxon_29	Firmicutes	Tissierellia	Tissierellales	Tissierellaceae	Paratissierella segnis	BX21	1.32882	NMDCN000010T	MT905152		Yes
Taxon_30	Firmicutes	Clostridia	Clostridiales	Oscillospiraceae	Bittarella massiliensis	NSJ-19	1.32824	NMDCN000010U	MT905153		effectively published but not validly published
Taxon_32	Actinobacteria	Coriobacteriia	Eggerthellales	Eggerthellaceae	Eggerthella hominis	NSJ-70	1.32846	NMDCN000010V	NA		Yes
Taxon_33	Actinobacteria	Coriobacteriia	Eggerthellales	Eggerthellaceae	Gordonibacter massiliensis	NSJ-58	1.32834	NMDCN0000110	MT905154		effectively published but not validly published
Taxon_35	Bacteroidetes	Bacteroidia	Bacteroidales	Bacteroidaceae	Bacteroides multiformis	L5	1.32865	NMDCN0000112	MT905156		Yes
Taxon_36	Bacteroidetes	Bacteroidia	Bacteroidales	Bacteroidaceae	Bacteroides facilis	NSJ-77	1.32853	NMDCN0000113	MT905157		Yes
Taxon_38	Bacteroidetes	Bacteroidia	Bacteroidales	Bacteroidaceae	Bacteroides difficilis	NSJ-74	1.32850	NMDCN0000115	MT905159		Yes
Taxon_39	Bacteroidetes	Bacteroidia	Bacteroidales	Bacteroidaceae	Bacteroides hominis	NSJ-2	1.31481	NMDCN0000116	MT905160		Yes
Taxon_40	Bacteroidetes	Bacteroidia	Bacteroidales	Bacteroidaceae	Bacteroides parvus	NSJ-21	1.31612	NMDCN0000117	MT905161		Yes
Taxon_41	Bacteroidetes	Bacteroidia	Bacteroidales	Barnesiellaceae	Barnesiella faecis	BX6	1.32883	NMDCN0000118	MT905162		Yes
Taxon_42	Bacteroidetes	Bacteroidia	Bacteroidales	Odoribacteraceae	Butyricimonas hominis	NSJ-56	1.32832	NMDCN0000119	MT905163		Yes
Taxon_43	Bacteroidetes	Bacteroidia	Bacteroidales	Porphyromonadaceae	Parabacteroides acidifaciens	426-9	1.13558	NMDCN000011A	MT905164		Yes
Taxon_44	Bacteroidetes	Bacteroidia	Bacteroidales	Porphyromonadaceae	Parabacteroides segnis	BX2	1.32884	NMDCN000011B	MT905165		Yes
Taxon_45	Bacteroidetes	Bacteroidia	Bacteroidales	Porphyromonadaceae	Parabacteroides hominis	NSJ-79	1.32855	NMDCN000011C	MT905166		Yes
Taxon_46	Bacteroidetes	Bacteroidia	Bacteroidales	Rikenellaceae	Alistipes hominis	New-7	1.31637	NMDCN000011D	MT905167		Yes
Taxon_47	Firmicutes	Bacilli	Bacillales	Bacillaceae	Ornithinibacillus hominis	BX22	1.32885	NMDCN000011E	MT905168		Yes
Taxon_48	Firmicutes	Bacilli	Lactobacillales	Streptococcaceae	Streptococcus hominis	NSJ-17	1.32470	NMDCN000011F	MT905169		Yes
Taxon_50	Firmicutes	Clostridia	Clostridiales	Christensenellaceae	Christensenella tenuis	NSJ-35	1.32808	NMDCN000011H	MT905171		Yes
Taxon_51	Firmicutes	Clostridia	Clostridiales	Clostridiaceae	Clostridium hominis	NSJ-6	1.32461	NMDCN000011I	MT905172		Yes
Taxon_53	Firmicutes	Clostridia	Clostridiales	Clostridiaceae	Clostridium lentum	NSJ-42	1.32815	NMDCN000011K	MT905174		Yes
Taxon_54	Firmicutes	Clostridia	Clostridiales	Clostridiaceae	Clostridium facile	NSJ-27	1.32800	NMDCN000011L	MT905175		Yes
Taxon_55	Firmicutes	Clostridia	Clostridiales	Lachnospiraceae	Anaerosacchariphilus hominis	NSJ-68	1.32844	NMDCN000011M	MT905176	otu_903_V3V5/Medium priority	Yes
Taxon_56	Firmicutes	Clostridia	Clostridiales	Lachnospiraceae	Anaerostipes hominis	NSJ-7	1.32462	NMDCN000011N	MT905177		Yes
Taxon_57	Firmicutes	Clostridia	Clostridiales	Lachnospiraceae	Blautia massiliensis	4-46	1.52830	NMDCN000011O	MT905178		effectively published but not validly published
Taxon_58	Firmicutes	Clostridia	Clostridiales	Lachnospiraceae	Blautia intestinalis	27-44	1.52850	NMDCN000011P	MT905179		Yes
Taxon_59	Firmicutes	Clostridia	Clostridiales	Lachnospiraceae	Blautia segnis	BX17	1.32886	NMDCN000011Q	MT905180		Yes
Taxon_60	Firmicutes	Clostridia	Clostridiales	Lachnospiraceae	Blautia tarda	BX19	1.32887	NMDCN000011R	MT905181	otu_561_V3V5/Medium priority	Yes
Taxon_61	Firmicutes	Clostridia	Clostridiales	Lachnospiraceae	Blautia celeris	NSJ-34	1.32807	NMDCN000011S	MT905182		Yes
Taxon_62	Firmicutes	Clostridia	Clostridiales	Lachnospiraceae	Blautia lenta	M16	1.32888	NMDCN000011T	MT905183		Yes
Taxon_63	Firmicutes	Clostridia	Clostridiales	Lachnospiraceae	Blautia difficilis	M29	1.32889	NMDCN000011U	MT905184		Yes
Taxon_64	Firmicutes	Clostridia	Clostridiales	Clostridiaceae	Clostridium segne	BX14	1.32890	NMDCN000011V	MT903385	otu_1054_V3V5/High priority	Yes
Taxon_65	Firmicutes	Clostridia	Clostridiales	Lachnospiraceae	Coprococcus hominis	NSJ-10	1.32463	NMDCN0000120	MT905185		Yes
Taxon_66	Firmicutes	Clostridia	Clostridiales	Lachnospiraceae	Dorea hominis	NSJ-36	1.32809	NMDCN0000121	MT903386		Yes
Taxon_67	Firmicutes	Clostridia	Clostridiales	Lachnospiraceae	Enterocloster hominis	BX10	1.32891	NMDCN0000122	MT903391		Yes
Taxon_68	Firmicutes	Clostridia	Clostridiales	Eubacteriaceae	Eubacterium segne	BX4	1.32892	NMDCN0000123	MT905186		Yes
Taxon_69	Firmicutes	Clostridia	Clostridiales	Eubacteriaceae	Eubacterium difficile	M5	1.32893	NMDCN0000124	MT905187	otu_494_V1V3/High priority	Yes
Taxon_70	Firmicutes	Clostridia	Clostridiales	Lachnospiraceae	Hungatella hominis	NSJ-66	1.32842	NMDCN0000125	MT905188		Yes
Taxon_72	Firmicutes	Clostridia	Clostridiales	Lachnospiraceae	Lachnospira hominis	NSJ-43	1.32816	NMDCN0000127	MT905190	otu_499_V1V3/Medium priority	Yes
Taxon_73	Firmicutes	Clostridia	Clostridiales	Oscillospiraceae	Ruminococcus hominis	NSJ-13	1.52490	NMDCN0000128	MT905191		Yes
Taxon_74	Firmicutes	Clostridia	Clostridiales	Lachnospiraceae	Mediterraneibacter hominis	NSJ-55	1.32831	NMDCN0000129	MT903387		Yes
Taxon_75	Firmicutes	Clostridia	Clostridiales	Oscillospiraceae	Ruminococcus difficilis	M6	1.32867	NMDCN000012A	MT905192	otu_757_V3V5/Medium priority	Yes
Taxon_76	Firmicutes	Clostridia	Clostridiales	Lachnospiraceae	Roseburia lenta	NSJ-9	1.32469	NMDCN000012B	MT905193		Yes
Taxon_77	Firmicutes	Clostridia	Clostridiales	Lachnospiraceae	Roseburia yibonii	BX0805	1.32827	NMDCN000012C	MT905194		Yes
Taxon_78	Firmicutes	Clostridia	Clostridiales	Lachnospiraceae	Roseburia zhanii	BX1005	1.32828	NMDCN000012D	MT905195		Yes
Taxon_79	Firmicutes	Clostridia	Clostridiales	Lachnospiraceae	Roseburia rectibacter	NSJ-69	1.32845	NMDCN000012E	MT905196		Yes
Taxon_80	Firmicutes	Clostridia	Clostridiales	Lachnospiraceae	Roseburia difficilis	NSJ-67	1.32843	NMDCN000012F	MT905197	otu_346_V3V5/Medium priority	Yes
Taxon_81	Firmicutes	Clostridia	Clostridiales	Oscillospiraceae	Agathobaculum hominis	M2	1.32866	NMDCN000012G	MT905198		Yes
Taxon_82	Firmicutes	Clostridia	Clostridiales	Oscillospiraceae	Agathobaculum faecis	NSJ-28	1.32801	NMDCN000012H	MT905199		Yes
Taxon_83	Firmicutes	Clostridia	Clostridiales	Oscillospiraceae	Anaerotruncus massiliensis	22A2-44	1.52380	NMDCN000012I	MT905200		effectively published but not validly published
Taxon_84	Firmicutes	Clostridia	Clostridiales	Oscillospiraceae	Dysosmobacter segnis	BX15	1.32894	NMDCN000012J	MT905201	otu_190_V3V5/Medium priority	Yes
Taxon_85	Firmicutes	Clostridia	Clostridiales	Oscillospiraceae	Dysosmobacter hominis	NSJ-60	1.32836	NMDCN000012K	MT905202	otu_916_V3V5/Medium priority	Yes
Taxon_86	Firmicutes	Clostridia	Clostridiales	Oscillospiraceae	Faecalibacterium hominis	4P_15	1.52500	NMDCN000012L	MT905203		Yes
Taxon_87	Firmicutes	Clostridia	Clostridiales	Oscillospiraceae	Flintibacter faecis	BX5	1.32861	NMDCN000012M	MT905204		Yes
Taxon_88	Firmicutes	Clostridia	Clostridiales	Oscillospiraceae	Flintibacter hominis	New-19	1.31644	NMDCN000012N	MT905205		Yes
Taxon_89	Firmicutes	Clostridia	Clostridiales	Oscillospiraceae	Lawsonibacter hominis	NSJ-51	1.32825	NMDCN000012O	MT905206		Yes
Taxon_90	Firmicutes	Clostridia	Clostridiales	Oscillospiraceae	Lawsonibacter faecis	NSJ-52	1.32826	NMDCN000012P	MT905207		Yes
Taxon_91	Firmicutes	Clostridia	Clostridiales	Oscillospiraceae	Lawsonibacter celer	NSJ-47	1.32820	NMDCN000012Q	MT905208		Yes
Taxon_92	Firmicutes	Clostridia	Clostridiales	Oscillospiraceae	Neobittarella massiliensis	NSJ-65	1.32841	NMDCN000012R	MT905209		effectively published but not validly published
Taxon_93	Firmicutes	Clostridia	Clostridiales	Oscillospiraceae	Oscillibacter hominis	NSJ-62	1.32838	NMDCN000012S	MT905210		Yes
Taxon_94	Firmicutes	Clostridia	Clostridiales	Oscillospiraceae	Pseudoflavonifractor hominis	New-38	1.31611	NMDCN000012T	MT905211		Yes
Taxon_95	Firmicutes	Clostridia	Clostridiales	Oscillospiraceae	Ruminococcus lentus	NSJ-14	1.52640	NMDCN000012U	MT905212	otu_517_V3V5/Medium priority	Yes
Taxon_96	Firmicutes	Clostridia	Clostridiales	Oscillospiraceae	Ruminococcus intestinalis	NSJ-71	1.32847	NMDCN000012V	MT905213		Yes
Taxon_97	Firmicutes	Clostridia	Clostridiales	Peptostreptococcaceae	Paeniclostridium hominis	NSJ-45	1.32818	NMDCN0000130	MT903390		Yes
Taxon_98	Firmicutes	Clostridia	Clostridiales	Clostridiaceae	Romboutsia hominis	NSJ-18	1.31399	NMDCN0000131	MT905214		Yes
Taxon_99	Firmicutes	Clostridia	Clostridiales	Oscillospiraceae	Intestinimonas massiliensis	NSJ-30	1.32803	NMDCN0000132	MT905215		effectively published but not validly published
Taxon_100	Firmicutes	Clostridia	Clostridiales	Oscillospiraceae	Hydrogeniiclostridium hominis	NSJ-41	1.32814	NMDCN0000133	MT905216		Yes
Taxon_101	Firmicutes	Erysipelotrichia	Erysipelotrichales	Coprobacillaceae	Catenibacterium faecis	NSJ-22	1.31663	NMDCN0000134	MT905217		Yes
Taxon_102	Firmicutes	Clostridia	Eubacteriales	Eubacteriaceae	Eubacterium hominis	New-5	1.32837	NMDCN0000135	Submitted		Yes
Taxon_103	Firmicutes	Erysipelotrichia	Erysipelotrichales	Erysipelotrichaceae	Holdemanella hominis	L34	1.32895	NMDCN0000136	MT905218		Yes
Taxon_104	Firmicutes	Negativicutes	Veillonellales	Veillonellaceae	Megasphaera hominis	NSJ-59	1.32835	NMDCN0000137	MT905219		Yes
Taxon_105	Firmicutes	Negativicutes	Veillonellales	Veillonellaceae	Veillonella hominis	NSJ-78	1.32854	NMDCN0000138	MT905220		Yes
Taxon_106	Firmicutes	Tissierellia	Tissierellales	Tissierellaceae	Tissierella hominis	NSJ-26	1.31394	NMDCN0000139	MT905221		Yes
Taxon_107	Fusobacteria	Fusobacteriia	Fusobacteriales	Fusobacteriaceae	Fusobacterium hominis	NSJ-57	1.32833	NMDCN000013A	MT905222		Yes
Taxon_108	Proteobacteria	Gammaproteobacteria	Enterobacteriales	Enterobacteriaceae	Escherichia hominis	NSJ-73	1.32849	NMDCN000013B	MT905223		Yes
Taxon_31	Firmicutes	Clostridia	Clostridiales	Oscillospiraceae	Massiliimalia timonensis	NSJ-15	1.32466	NMDCN000013C	MT898668		No
Taxon_49	Firmicutes	Bacilli	Lactobacillales	Streptococcaceae	Streptococcus constellatus	NSJ-72	1.32848	NMDCN000011G	MT905170		No
Taxon_109	Actinobacteria	Actinobacteria	Actinomycetales	Actinomycetaceae	Actinomyces neuii	3-DE-D55-78	1.31725	NMDCN000013D	MT902936		No
Taxon_110	Actinobacteria	Actinobacteria	Actinomycetales	Corynebacteriaceae	Corynebacterium pyruviciproducens	1PYG-D20-DE-91	1.32669	NMDCN000013E	MT902937		No
Taxon_111	Actinobacteria	Actinobacteria	Actinomycetales	Propionibacteriaceae	Cutibacterium acnes	HP_D35_93	1.32436	NMDCN000013F	MT902938		No
Taxon_112	Actinobacteria	Actinobacteria	Bifidobacteriales	Bifidobacteriaceae	Bifidobacterium adolescentis	MNR-D2-20	1.32360	NMDCN000013G	MT902939		No
Taxon_113	Actinobacteria	Actinobacteria	Bifidobacteriales	Bifidobacteriaceae	Bifidobacterium animalis	ban1-6101-FNS-D20-50	1.32667	NMDCN000013H	MT902940		No
Taxon_114	Actinobacteria	Actinobacteria	Bifidobacteriales	Bifidobacteriaceae	Bifidobacterium bifidum	1_YM_DZP_D3_92.mj	1.32447	NMDCN000013I	MT902941		No
Taxon_115	Actinobacteria	Actinobacteria	Bifidobacteriales	Bifidobacteriaceae	Bifidobacterium dentium	4-GAMF-DE-D3-31	1.31563	NMDCN000013J	MT902942		No
Taxon_116	Actinobacteria	Actinobacteria	Bifidobacteriales	Bifidobacteriaceae	Bifidobacterium faecale	4-CP1-AT-SP-D3-35	1.32506	NMDCN000013K	MT902943		No
Taxon_117	Actinobacteria	Actinobacteria	Bifidobacteriales	Bifidobacteriaceae	Bifidobacterium longum	5-CP1-AT-SP3-D3-31	1.32518	NMDCN000013L	MT902944		No
Taxon_118	Actinobacteria	Actinobacteria	Bifidobacteriales	Bifidobacteriaceae	Bifidobacterium pseudocatenulatum	2BLK_dy_D6_64	1.31490	NMDCN000013M	MT902945		No
Taxon_119	Actinobacteria	Actinobacteria	Bifidobacteriales	Bifidobacteriaceae	Bifidobacterium stercoris	4_CP_SP_10.mj	1.32502	NMDCN000013N	MT902946		No
Taxon_120	Actinobacteria	Actinobacteria	Bifidobacteriales	Bifidobacteriaceae	Bifidobacterium pseudolongum	HM_AT_D5_54	1.32927	NMDCN000013O	MT902947		No
Taxon_121	Actinobacteria	Actinobacteria	Coriobacteriales	Coriobacteriaceae	Collinsella aerofaciens	1_YM_1669_D3_35	1.32446	NMDCN000013P	MT902948		No
Taxon_122	Actinobacteria	Actinobacteria	Coriobacteriales	Coriobacteriaceae	Collinsella intestinalis	3_YF_D14_13	1.32385	NMDCN000013Q	MT902949		No
Taxon_123	Actinobacteria	Actinobacteria	Coriobacteriales	Coriobacteriaceae	Collinsella stercoris	ban4-CP-GAM-D15-28	1.32928	NMDCN000013R	MT902950		No
Taxon_124	Actinobacteria	Actinobacteria	Micrococcales	Cellulomonadaceae	Cellulomonas hominis	24-X-1-B5	1.32795	NMDCN000013S	MT902951		No
Taxon_125	Actinobacteria	Actinobacteria	Micrococcales	Dermabacteraceae	Dermabacter vaginalis	ban1-1669N-D30-18	1.32929	NMDCN000013T	MT902952		No
Taxon_126	Actinobacteria	Coriobacteriia	Eggerthellales	Eggerthellaceae	Adlercreutzia equolifaciens	2BLK-D5-20	1.31322	NMDCN000013U	MT902953		No
Taxon_127	Actinobacteria	Coriobacteriia	Eggerthellales	Eggerthellaceae	Asaccharobacter celatus	4PYG-DE-D15-28	1.32930	NMDCN000013V	MT902954		No
Taxon_128	Actinobacteria	Coriobacteriia	Eggerthellales	Eggerthellaceae	Eggerthella lenta	CG-D3-36	1.31934	NMDCN0000140	MT902955		No
Taxon_129	Actinobacteria	Coriobacteriia	Eggerthellales	Eggerthellaceae	Gordonibacter faecihominis	29-X-1-C3	1.32798	NMDCN0000141	MT902956		No
Taxon_130	Actinobacteria	Coriobacteriia	Eggerthellales	Eggerthellaceae	Gordonibacter pamelaeae	2_1669N_D14_90	1.32377	NMDCN0000142	MT902957		No
Taxon_131	Actinobacteria	Coriobacteriia	Eggerthellales	Eggerthellaceae	Gordonibacter urolithinfaciens	1-DE-D30-9	1.32931	NMDCN0000143	MT902958		No
Taxon_132	Actinobacteria	Coriobacteriia	Eggerthellales	Eggerthellaceae	Paraeggerthella hongkongensis	ban1-PYG-KN-D8-55	1.32736	NMDCN0000144	MT902959		No
Taxon_133	Actinobacteria	Coriobacteriia	Eggerthellales	Eggerthellaceae	Raoultibacter massiliensis	ban4-RY-D5-23	1.32932	NMDCN0000145	MT902960		No
Taxon_134	Actinobacteria	Coriobacteriia	Eggerthellales	Eggerthellaceae	Raoultibacter timonensis	GAMB-D35-65	1.31465	NMDCN0000146	MT902961		No
Taxon_135	Actinobacteria	Coriobacteriia	Eggerthellales	Eggerthellaceae	Slackia isoflavoniconvertens	ban6-RX-D5-89	1.32933	NMDCN0000147	MT902962		No
Taxon_136	Bacteroidetes	Bacteroidia	Bacteroidales	Bacteroidaceae	Bacteroides caccae	9-P-D5-96	1.32559	NMDCN0000148	MT902963		No
Taxon_137	Bacteroidetes	Bacteroidia	Bacteroidales	Bacteroidaceae	Bacteroides cellulosilyticus	CP-GAM-D15-39	1.31954	NMDCN0000149	MT902964		No
Taxon_138	Bacteroidetes	Bacteroidia	Bacteroidales	Bacteroidaceae	Bacteroides coprocola	MBEF-MGAM-D3-7	1.31797	NMDCN000014A	MT902965		No
Taxon_139	Bacteroidetes	Bacteroidia	Bacteroidales	Bacteroidaceae	Bacteroides dorei	3M3-1669B-D7-11	1.31935	NMDCN000014B	MT902966		No
Taxon_140	Bacteroidetes	Bacteroidia	Bacteroidales	Bacteroidaceae	Bacteroides eggerthii	p1-1-X-G-D7	1.32608	NMDCN000014C	MT902967		No
Taxon_141	Bacteroidetes	Bacteroidia	Bacteroidales	Bacteroidaceae	Bacteroides finegoldii	YF_D7_43	1.31990	NMDCN000014D	MT902968		No
Taxon_142	Bacteroidetes	Bacteroidia	Bacteroidales	Bacteroidaceae	Bacteroides fragilis	FG-D1-16	1.31933	NMDCN000014E	MT902969		No
Taxon_143	Bacteroidetes	Bacteroidia	Bacteroidales	Bacteroidaceae	Bacteroides intestinalis	CP_AT_DS_SB_D15_60	1.31963	NMDCN000014F	MT902970		No
Taxon_144	Bacteroidetes	Bacteroidia	Bacteroidales	Bacteroidaceae	Bacteroides koreensis	ban4-RP-D5-10	1.32743	NMDCN000014G	MT902971		No
Taxon_145	Bacteroidetes	Bacteroidia	Bacteroidales	Bacteroidaceae	Bacteroides kribbi	ZN-GAM-D3-86	1.31810	NMDCN000014H	MT902972		No
Taxon_146	Bacteroidetes	Bacteroidia	Bacteroidales	Bacteroidaceae	Bacteroides massiliensis	4GAM-DE-D20-76	1.31639	NMDCN000014I	MT902973		No
Taxon_147	Bacteroidetes	Bacteroidia	Bacteroidales	Bacteroidaceae	Bacteroides nordii	CP-GAM-D3-68	1.32414	NMDCN000014J	MT902974		No
Taxon_148	Bacteroidetes	Bacteroidia	Bacteroidales	Bacteroidaceae	Bacteroides ovatus	10-PG-D9-75	1.32550	NMDCN000014K	MT902975		No
Taxon_149	Bacteroidetes	Bacteroidia	Bacteroidales	Bacteroidaceae	Bacteroides salyersiae	1BLK_dy_D2_22	1.31467	NMDCN000014L	MT902976		No
Taxon_150	Bacteroidetes	Bacteroidia	Bacteroidales	Bacteroidaceae	Bacteroides stercoris	BAN1_D8_70	1.32361	NMDCN000014M	MT902977		No
Taxon_151	Bacteroidetes	Bacteroidia	Bacteroidales	Bacteroidaceae	Bacteroides thetaiotaomicron	Y-CP-D3-23	1.32481	NMDCN000014N	MT902978		No
Taxon_152	Bacteroidetes	Bacteroidia	Bacteroidales	Bacteroidaceae	Bacteroides uniformis	3_YM_SP_D4_39.mj	1.32496	NMDCN000014O	MT902979		No
Taxon_153	Bacteroidetes	Bacteroidia	Bacteroidales	Bacteroidaceae	Bacteroides vulgatus	3BLK-D2-28	1.31305	NMDCN000014P	MT902980		No
Taxon_154	Bacteroidetes	Bacteroidia	Bacteroidales	Bacteroidaceae	Bacteroides xylanisolvens	CP-FAB-D3-44	1.32474	NMDCN000014Q	MT902981		No
Taxon_155	Bacteroidetes	Bacteroidia	Bacteroidales	Bacteroidaceae	Bacteroides plebeius	1-YM-FAB-03-5	1.32934	NMDCN000014R	MT902982		No
Taxon_156	Bacteroidetes	Bacteroidia	Bacteroidales	Bacteroidaceae	Bacteroides coprophilus	1669_D10_88	1.32935	NMDCN000014S	MT902983		No
Taxon_157	Bacteroidetes	Bacteroidia	Bacteroidales	Bacteroidaceae	Bacteroides faecis	ban2-v-P-D5-49	1.32772	NMDCN000014T	MT902984		No
Taxon_158	Bacteroidetes	Bacteroidia	Bacteroidales	Bacteroidaceae	Bacteroides faecichinchillae	5-HM-GAM-D5-36	1.32936	NMDCN000014U	MT902985		No
Taxon_159	Bacteroidetes	Bacteroidia	Bacteroidales	Barnesiellaceae	Barnesiella intestinihominis	ban3_3GAM_DE_D3_76	1.32937	NMDCN000014V	MT902986		No
Taxon_160	Bacteroidetes	Bacteroidia	Bacteroidales	Odoribacteraceae	Butyricimonas faecihominis	ban1-27-KSATO-1-XN	1.32762	NMDCN0000150	MT902987	otu_213_V3V5/High priority	No
Taxon_161	Bacteroidetes	Bacteroidia	Bacteroidales	Odoribacteraceae	Butyricimonas virosa	YN_D14_68	1.32303	NMDCN0000151	MT902988		No
Taxon_162	Bacteroidetes	Bacteroidia	Bacteroidales	Odoribacteraceae	Odoribacter splanchnicus	CP2-D15-bu-80	1.31950	NMDCN0000152	MT902989		No
Taxon_163	Bacteroidetes	Bacteroidia	Bacteroidales	Porphyromonadaceae	Coprobacter fastidiosus	Y-D20-29	1.32652	NMDCN0000153	MT902990	otu_431_V3V5/Medium priority	No
Taxon_164	Bacteroidetes	Bacteroidia	Bacteroidales	Porphyromonadaceae	Parabacteroides distasonis	9-G-D8-11	1.32579	NMDCN0000154	MT902991		No
Taxon_165	Bacteroidetes	Bacteroidia	Bacteroidales	Porphyromonadaceae	Parabacteroides faecis	3BLK-D2-90	1.31309	NMDCN0000155	MT902992		No
Taxon_166	Bacteroidetes	Bacteroidia	Bacteroidales	Porphyromonadaceae	Parabacteroides goldsteinii	3_BLK_dy_D2_54	1.31476	NMDCN0000156	MT902993		No
Taxon_167	Bacteroidetes	Bacteroidia	Bacteroidales	Porphyromonadaceae	Parabacteroides johnsonii	3_CP_F_D5_66.mj	1.32488	NMDCN0000157	MT902994		No
Taxon_168	Bacteroidetes	Bacteroidia	Bacteroidales	Porphyromonadaceae	Parabacteroides merdae	1_YM_FAB_03_17.mj	1.32477	NMDCN0000158	MT902995		No
Taxon_169	Bacteroidetes	Bacteroidia	Bacteroidales	Prevotellaceae	Prevotella copri	ban1-V-X-D5-73	1.32768	NMDCN0000159	MT902996		No
Taxon_170	Bacteroidetes	Bacteroidia	Bacteroidales	Rikenellaceae	Alistipes communis	4GAM-DE-D20-14	1.31653	NMDCN000015A	MT902997		No
Taxon_171	Bacteroidetes	Bacteroidia	Bacteroidales	Rikenellaceae	Alistipes finegoldii	2_1669N_D14_75	1.32492	NMDCN000015B	MT902998		No
Taxon_172	Bacteroidetes	Bacteroidia	Bacteroidales	Rikenellaceae	Alistipes indistinctus	4GAM-DE-D20-49	1.32998	NMDCN000015C	MT902999		No
Taxon_173	Bacteroidetes	Bacteroidia	Bacteroidales	Rikenellaceae	Alistipes onderdonkii	CP-GAM-D15-48	1.31956	NMDCN000015D	MT903000	otu_377_V1V3/Medium priority	No
Taxon_174	Bacteroidetes	Bacteroidia	Bacteroidales	Rikenellaceae	Alistipes putredinis	CP_SP_D16_80	1.31981	NMDCN000015E	MT903001		No
Taxon_175	Bacteroidetes	Bacteroidia	Bacteroidales	Rikenellaceae	Alistipes senegalensis	p4-29-X-Y-D7	1.32631	NMDCN000015F	MT903002		No
Taxon_176	Bacteroidetes	Bacteroidia	Bacteroidales	Rikenellaceae	Alistipes shahii	1_NF_D15_88	1.32374	NMDCN000015G	MT903003	otu_909_V3V5/Medium priority	No
Taxon_177	Bacteroidetes	Bacteroidia	Bacteroidales	Rikenellaceae	Tidjanibacter massiliensis	CP-D15-Y-75	1.31947	NMDCN000015H	MT903004		No
Taxon_178	Firmicutes	Bacilli	Bacillales	Bacillaceae	Bacillus albus	4-GAMF-DE-D3-8	1.32938	NMDCN000015I	MT903005		No
Taxon_179	Firmicutes	Bacilli	Bacillales	Bacillaceae	Bacillus amyloliquefaciens	OD3_20	1.31327	NMDCN000015J	MT903006		No
Taxon_180	Firmicutes	Bacilli	Bacillales	Bacillaceae	Bacillus aryabhattai	3-A11	1.32939	NMDCN000015K	MT903007		No
Taxon_181	Firmicutes	Bacilli	Bacillales	Bacillaceae	Bacillus cereus	GAM_D2_40	1.31354	NMDCN000015L	MT903008		No
Taxon_182	Firmicutes	Bacilli	Bacillales	Bacillaceae	Bacillus circulans	ZN-AT-D3-19	1.31809	NMDCN000015M	MT903009		No
Taxon_183	Firmicutes	Bacilli	Bacillales	Bacillaceae	Bacillus crescens	OD3-11	1.31312	NMDCN000015N	MT903010		No
Taxon_184	Firmicutes	Bacilli	Bacillales	Bacillaceae	Bacillus depressus	2-DE-D45-94	1.31658	NMDCN000015O	MT903011		No
Taxon_185	Firmicutes	Bacilli	Bacillales	Bacillaceae	Bacillus licheniformis	p3-27-X-YH-D7	1.32607	NMDCN000015P	MT903012		No
Taxon_186	Firmicutes	Bacilli	Bacillales	Bacillaceae	Bacillus massiliosenegalensis	OD3-13	1.31314	NMDCN000015Q	MT903013		No
Taxon_187	Firmicutes	Bacilli	Bacillales	Bacillaceae	Bacillus paramycoides	pur-32	1.31737	NMDCN000015R	MT903014		No
Taxon_188	Firmicutes	Bacilli	Bacillales	Bacillaceae	Bacillus proteolyticus	pur-11	1.31735	NMDCN000015S	MT903015		No
Taxon_189	Firmicutes	Bacilli	Bacillales	Bacillaceae	Bacillus safensis	ban2-GN-W4-D5-21	1.32940	NMDCN000015T	MT903016		No
Taxon_190	Firmicutes	Bacilli	Bacillales	Bacillaceae	Bacillus siralis	OD3-12	1.31313	NMDCN000015U	MT903017		No
Taxon_191	Firmicutes	Bacilli	Bacillales	Bacillaceae	Bacillus subtilis	3-DE-D30-32	1.31648	NMDCN000015V	MT903018		No
Taxon_192	Firmicutes	Bacilli	Bacillales	Bacillaceae	Bacillus timonensis	OD3-8	1.31310	NMDCN0000160	MT903019		No
Taxon_193	Firmicutes	Bacilli	Bacillales	Bacillaceae	Bacillus tropicus	BC-P-D1-1	1.31723	NMDCN0000161	MT903020		No
Taxon_194	Firmicutes	Bacilli	Bacillales	Bacillaceae	Bacillus rhizosphaerae	ban2-GN-W4-D5-19	1.32941	NMDCN0000162	MT903021		No
Taxon_195	Firmicutes	Bacilli	Bacillales	Bacillaceae	Bacillus wiedmannii	HM_AT_D5_56	1.32942	NMDCN0000163	MT903022		No
Taxon_196	Firmicutes	Bacilli	Bacillales	Bacillaceae	Lysinibacillus fusiformis	1-DE-D45-33	1.31856	NMDCN0000164	MT903023		No
Taxon_197	Firmicutes	Bacilli	Bacillales	Bacillaceae	Oceanobacillus caeni	ban3-KBX-15	1.32943	NMDCN0000165	MT903024		No
Taxon_198	Firmicutes	Bacilli	Bacillales	Paenibacillaceae	Paenibacillus woosongensis	ZN-AT-D3-47	1.31822	NMDCN0000166	MT903025		No
Taxon_199	Firmicutes	Bacilli	Bacillales	Paenibacillaceae	Paenibacillus lautus	1_DE_D45_41	1.32944	NMDCN0000167	MT903026		No
Taxon_200	Firmicutes	Bacilli	Bacillales	Planococcaceae	Sporosarcina koreensis	2-DE-D45-60	1.31661	NMDCN0000168	MT903027		No
Taxon_201	Firmicutes	Bacilli	Bacillales	Staphylococcaceae	Staphylococcus capitis	3AT_dyB_D6_37	1.31499	NMDCN0000169	MT903028		No
Taxon_202	Firmicutes	Bacilli	Bacillales	Staphylococcaceae	Staphylococcus epidermidis	ban2-v-Y-D5-30	1.32773	NMDCN000016A	MT903029		No
Taxon_203	Firmicutes	Bacilli	Bacillales	Staphylococcaceae	Staphylococcus haemolyticus	p3-41-GH-D7	1.32632	NMDCN000016B	MT903030		No
Taxon_204	Firmicutes	Bacilli	Bacillales	Staphylococcaceae	Staphylococcus hominis	GNSAT-D2-14	1.32393	NMDCN000016C	MT903031		No
Taxon_205	Firmicutes	Bacilli	Bacillales	Staphylococcaceae	Staphylococcus warneri	FAB_D2_26	1.31350	NMDCN000016D	MT903032		No
Taxon_206	Firmicutes	Bacilli	Lactobacillales	Enterococcaceae	Enterococcus avium	WCB-D35-83	1.31451	NMDCN000016E	MT903033		No
Taxon_207	Firmicutes	Bacilli	Lactobacillales	Enterococcaceae	Enterococcus faecalis	AM-D2-56	1.31895	NMDCN000016F	MT903034		No
Taxon_208	Firmicutes	Bacilli	Lactobacillales	Enterococcaceae	Enterococcus faecium	DM-D1-49	1.31881	NMDCN000016G	MT903035		No
Taxon_209	Firmicutes	Bacilli	Lactobacillales	Enterococcaceae	Enterococcus gallinarum	1_1MRS_DE_D3_42	1.31520	NMDCN000016H	MT903036		No
Taxon_210	Firmicutes	Bacilli	Lactobacillales	Enterococcaceae	Enterococcus gilvus	1_SR_D15_70	1.32372	NMDCN000016I	MT903037		No
Taxon_211	Firmicutes	Bacilli	Lactobacillales	Enterococcaceae	Enterococcus hirae	GNNH-D2-75	1.32321	NMDCN000016J	MT903038		No
Taxon_212	Firmicutes	Bacilli	Lactobacillales	Enterococcaceae	Enterococcus raffinosus	ban1-6101-FNS-D20-44	1.32523	NMDCN000016K	MT903039		No
Taxon_213	Firmicutes	Bacilli	Lactobacillales	Enterococcaceae	Enterococcus thailandicus	AM-D2-55	1.31888	NMDCN000016L	MT903040		No
Taxon_214	Firmicutes	Bacilli	Lactobacillales	Enterococcaceae	Enterococcus canintestini	ban2-68-1669F-12	1.32945	NMDCN000016M	MT903041		No
Taxon_215	Firmicutes	Bacilli	Lactobacillales	Enterococcaceae	Enterobacter cloacae	ZN_1669_D3_96	1.32946	NMDCN000016N	MT903042		No
Taxon_216	Firmicutes	Bacilli	Lactobacillales	Enterococcaceae	Enterococcus casseliflavus	ban9_PYG_DE_D4_55	1.32947	NMDCN000016O	MT903043		No
Taxon_217	Firmicutes	Bacilli	Lactobacillales	Lactobacillaceae	Lactobacillus gasseri	1_1MRS_DE_D3_50	1.31595	NMDCN000016P	MT903044		No
Taxon_218	Firmicutes	Bacilli	Lactobacillales	Lactobacillaceae	Lactobacillus johnsonii	5-CP1-AT-SP2-D3-89	1.32512	NMDCN000016Q	MT903045		No
Taxon_219	Firmicutes	Bacilli	Lactobacillales	Lactobacillaceae	Lactobacillus mucosae	3_PYGN_DE_D3_13	1.31574	NMDCN000016R	MT903046		No
Taxon_220	Firmicutes	Bacilli	Lactobacillales	Lactobacillaceae	Lactobacillus paracasei	ban4-YM-M-D12-67	1.32539	NMDCN000016S	MT903047		No
Taxon_221	Firmicutes	Bacilli	Lactobacillales	Lactobacillaceae	Lactobacillus plantarum	YF_7	1.32311	NMDCN000016T	MT903048		No
Taxon_222	Firmicutes	Bacilli	Lactobacillales	Lactobacillaceae	Lactobacillus reuteri	5-CP1-AT-SP2-D3-70	1.32511	NMDCN000016U	MT903049		No
Taxon_223	Firmicutes	Bacilli	Lactobacillales	Lactobacillaceae	Lactobacillus rhamnosus	ban2-v-Y-D5-18	1.32723	NMDCN000016V	MT903050		No
Taxon_224	Firmicutes	Bacilli	Lactobacillales	Lactobacillaceae	Lactobacillus ruminis	8-CBN-DE-D4-29	1.31583	NMDCN0000170	MT903051		No
Taxon_225	Firmicutes	Bacilli	Lactobacillales	Lactobacillaceae	Lactobacillus salivarius	3_YM_GAM_D4_73.mj	1.32454	NMDCN0000171	MT903052		No
Taxon_226	Firmicutes	Bacilli	Lactobacillales	Lactobacillaceae	Lactobacillus animalis	5-CP1-AT-SP2-D3-84	1.32948	NMDCN0000172	MT903053		No
Taxon_227	Firmicutes	Bacilli	Lactobacillales	Lactobacillaceae	Lactobacillus fermentum	ban2-VX-D14-6	1.32949	NMDCN0000173	MT903054		No
Taxon_228	Firmicutes	Bacilli	Lactobacillales	Lactobacillaceae	Lactobacillus harbinensis	ban2-VY-D25-1	1.32950	NMDCN0000174	MT903055		No
Taxon_229	Firmicutes	Bacilli	Lactobacillales	Lactobacillaceae	Lactobacillus rogosae	p6-33-X-ATC-9-D5	1.32624	NMDCN0000175	MT903056		No
Taxon_230	Firmicutes	Bacilli	Lactobacillales	Lactobacillaceae	Lactobacillus vaginalis	Seq_ban1-V-X-D5-38	1.32951	NMDCN0000176	MT903057		No
Taxon_231	Firmicutes	Bacilli	Lactobacillales	Lactobacillaceae	Lactobacillus murinus	ban2HM-MRS-D5-32	1.32952	NMDCN0000177	MT903058		No
Taxon_232	Firmicutes	Bacilli	Lactobacillales	Lactobacillaceae	Lactobacillus crispatus	HM_AT_D5_57	1.32953	NMDCN0000178	MT903059		No
Taxon_233	Firmicutes	Bacilli	Lactobacillales	Lactobacillaceae	Pediococcus acidilactici	YF_19	1.32312	NMDCN0000179	MT903060		No
Taxon_234	Firmicutes	Bacilli	Lactobacillales	Leuconostocaceae	Leuconostoc lactis	p4-32-X-Y-D7	1.32604	NMDCN000017A	MT903061		No
Taxon_235	Firmicutes	Bacilli	Lactobacillales	Leuconostocaceae	Weissella cibaria	2_PYGF_DE_D3_95	1.31526	NMDCN000017B	MT903062		No
Taxon_236	Firmicutes	Bacilli	Lactobacillales	Leuconostocaceae	Weissella confusa	p1-22-X-G-D7	1.32633	NMDCN000017C	MT903063		No
Taxon_237	Firmicutes	Bacilli	Lactobacillales	Streptococcaceae	Lactococcus garvieae	2_YM_XJ_40.mj	1.32449	NMDCN000017D	MT903064		No
Taxon_238	Firmicutes	Bacilli	Lactobacillales	Streptococcaceae	Lactococcus lactis	5-CP1-AT-SP2-D3-91	1.32513	NMDCN000017E	MT903065	otu_353_V3V5/Medium priority	No
Taxon_239	Firmicutes	Bacilli	Lactobacillales	Streptococcaceae	Streptococcus oralis	ZN_GAM_D3_65	1.32954	NMDCN000017F	MT903066		No
Taxon_240	Firmicutes	Bacilli	Lactobacillales	Streptococcaceae	Streptococcus pseudopneumoniae	3-DE-D45-89	1.32955	NMDCN000017G	MT903067		No
Taxon_241	Firmicutes	Bacilli	Lactobacillales	Streptococcaceae	Streptococcus anginosus	3_YM_GAM_D4_57.mj	1.32453	NMDCN000017H	MT903068		No
Taxon_242	Firmicutes	Bacilli	Lactobacillales	Streptococcaceae	Streptococcus intermedius	2_PYGF_DE_D3_40	1.31581	NMDCN000017I	MT903069		No
Taxon_243	Firmicutes	Bacilli	Lactobacillales	Streptococcaceae	Streptococcus lutetiensis	GNNH-D2-72	1.32319	NMDCN000017J	MT903070		No
Taxon_244	Firmicutes	Bacilli	Lactobacillales	Streptococcaceae	Streptococcus mutans	1_NG_D13_23	1.32395	NMDCN000017K	MT903071		No
Taxon_245	Firmicutes	Bacilli	Lactobacillales	Streptococcaceae	Streptococcus parasanguinis	1_MRS_DE_D3_70	1.31560	NMDCN000017L	MT903072		No
Taxon_246	Firmicutes	Bacilli	Lactobacillales	Streptococcaceae	Streptococcus pasteurianus	ban1-NC-D30-25	1.32530	NMDCN000017M	MT903073		No
Taxon_247	Firmicutes	Bacilli	Lactobacillales	Streptococcaceae	Streptococcus salivarius	1_YM_1669_D3_26	1.32445	NMDCN000017N	MT903074		No
Taxon_248	Firmicutes	Bacilli	Lactobacillales	Streptococcaceae	Streptococcus sanguinis	4_CP_SP_17.mj	1.32956	NMDCN000017O	MT903075		No
Taxon_249	Firmicutes	Bacilli	Lactobacillales	Streptococcaceae	Streptococcus tigurinus	1_1MRS_DE_D3_9	1.31559	NMDCN000017P	MT903076		No
Taxon_250	Firmicutes	Clostridia	Clostridiales	Christensenellaceae	Christensenella minuta	ban2-YS-D30-20	1.32672	NMDCN000017Q	MT903077		No
Taxon_251	Firmicutes	Clostridia	Clostridiales	Clostridiaceae	Clostridioides mangenotii	p4-34-X-G-D7	1.32610	NMDCN000017R	MT903078		No
Taxon_252	Firmicutes	Clostridia	Clostridiales	Clostridiaceae	Clostridium symbiosum	2CBN-DE-D5-12	1.31605	NMDCN000017S	MT903079		No
Taxon_253	Firmicutes	Clostridia	Clostridiales	Clostridiaceae	Clostridium aldenense	4ZN-AT-D50-69	1.31909	NMDCN000017T	MT903080		No
Taxon_254	Firmicutes	Clostridia	Clostridiales	Clostridiaceae	Clostridium baratii	AM-D2-46	1.31884	NMDCN000017U	MT903081		No
Taxon_255	Firmicutes	Clostridia	Clostridiales	Clostridiaceae	Clostridium bolteae	9-PYG-DE-D4-66	1.31572	NMDCN000017V	MT903082		No
Taxon_256	Firmicutes	Clostridia	Clostridiales	Clostridiaceae	Clostridium butyricum	pur-19	1.31736	NMDCN0000180	MT903083		No
Taxon_257	Firmicutes	Clostridia	Clostridiales	Clostridiaceae	Clostridium celerecrescens	2-Znew-1	1.31829	NMDCN0000181	MT903084		No
Taxon_258	Firmicutes	Clostridia	Clostridiales	Clostridiaceae	Clostridium citroniae	4-DE-D45-79	1.31667	NMDCN0000182	MT903085		No
Taxon_259	Firmicutes	Clostridia	Clostridiales	Clostridiaceae	Clostridium clostridioforme	ban2-XN-W4-D5-26	1.32679	NMDCN0000183	MT903086		No
Taxon_260	Firmicutes	Clostridia	Clostridiales	Clostridiaceae	Clostridium dakarense	1AT-D2-19	1.31286	NMDCN0000184	MT903087		No
Taxon_261	Firmicutes	Clostridia	Clostridiales	Clostridiaceae	Clostridium disporicum	C-FAT-D2-65	1.32358	NMDCN0000185	MT903088		No
Taxon_262	Firmicutes	Clostridia	Clostridiales	Clostridiaceae	Clostridium innocuum	4ZN-AT-D50-86	1.31910	NMDCN0000186	MT903089		No
Taxon_263	Firmicutes	Clostridia	Clostridiales	Clostridiaceae	Clostridium lavalense	AT_D16_42	1.31996	NMDCN0000187	MT903090		No
Taxon_264	Firmicutes	Clostridia	Clostridiales	Clostridiaceae	Clostridium leptum	CP-GAM-D15-35	1.31953	NMDCN0000188	MT903091		No
Taxon_265	Firmicutes	Clostridia	Clostridiales	Clostridiaceae	Clostridium methylpentosum	p2-5-X-ATA-Y-D5	1.32605	NMDCN0000189	MT903092		No
Taxon_266	Firmicutes	Clostridia	Clostridiales	Clostridiaceae	Clostridium nexile	ban3-3M3-1669B-D7-24	1.32957	NMDCN000018A	MT903093		No
Taxon_267	Firmicutes	Clostridia	Clostridiales	Clostridiaceae	Clostridium paraputrificum	CjiaFAT-D2-73	1.32323	NMDCN000018B	MT903094		No
Taxon_268	Firmicutes	Clostridia	Clostridiales	Clostridiaceae	Clostridium perfringens	CP-D2P-D3-56	1.32421	NMDCN000018C	MT903095		No
Taxon_269	Firmicutes	Clostridia	Clostridiales	Clostridiaceae	Clostridium saudiense	CP_AT_DS_SB_D15_41	1.31941	NMDCN000018D	MT903096		No
Taxon_270	Firmicutes	Clostridia	Clostridiales	Clostridiaceae	Clostridium scindens	CP-GAM-D3-91	1.32304	NMDCN000018E	MT903097		No
Taxon_271	Firmicutes	Clostridia	Clostridiales	Clostridiaceae	Clostridium senegalense	WC-D35-4	1.31452	NMDCN000018F	MT903098		No
Taxon_272	Firmicutes	Clostridia	Clostridiales	Clostridiaceae	Clostridium sporogenes	ban2-C-NATD30-69	1.32532	NMDCN000018G	MT903099		No
Taxon_273	Firmicutes	Clostridia	Clostridiales	Clostridiaceae	Clostridium tertium	10-PN-D5-90	1.32576	NMDCN000018H	MT903100		No
Taxon_274	Firmicutes	Clostridia	Clostridiales	Clostridiaceae	Clostridium glycyrrhizinilyticum	ban1_9_G_D3_44	1.32958	NMDCN000018I	MT903101		No
Taxon_275	Firmicutes	Clostridia	Clostridiales	Clostridiaceae	Clostridium cochlearium	BANSI_YN_4	1.32959	NMDCN000018J	MT903102		No
Taxon_276	Firmicutes	Clostridia	Clostridiales	Clostridiaceae	Clostridium celatum	L10	1.32960	NMDCN000018K	MT903103		No
Taxon_277	Firmicutes	Clostridia	Clostridiales	Clostridiaceae	Eisenbergiella tayi	GNNAT_25	1.32464	NMDCN000018L	MT903104	otu_1023_V3V5/Medium priority	No
Taxon_278	Firmicutes	Clostridia	Clostridiales	Clostridiaceae	Erysipelatoclostridium ramosum	ban3-KA1GN-4	1.32709	NMDCN000018M	MT903105		No
Taxon_279	Firmicutes	Clostridia	Clostridiales	Clostridiaceae	Extibacter muris	p4-16-X-ATB-Y-D5	1.32586	NMDCN000018N	MT903106		No
Taxon_280	Firmicutes	Clostridia	Clostridiales	Lachnospiraceae	Hungatella effluvii	YM_GN_D4_96.mj	1.31991	NMDCN000018O	MT903107		No
Taxon_281	Firmicutes	Clostridia	Clostridiales	Lachnospiraceae	Hungatella hathewayi	Seq_2-PN-K-D15-26	1.32961	NMDCN000018P	MT903108		No
Taxon_282	Firmicutes	Clostridia	Clostridiales	Clostridiaceae	Intestinibacter bartlettii	CP_GN_D16_4	1.31976	NMDCN000018Q	MT903109		No
Taxon_283	Firmicutes	Clostridia	Clostridiales	Clostridiaceae	Lactonifactor longoviformis	DE-D120-2	1.31913	NMDCN000018R	MT903110		No
Taxon_284	Firmicutes	Clostridia	Clostridiales	Clostridiaceae	Paraclostridium benzoelyticum	RAT0-Y-D5-2	1.32733	NMDCN000018S	MT903111		No
Taxon_285	Firmicutes	Clostridia	Clostridiales	Clostridiaceae	Paraclostridium bifermentans	ban2-YN-D30-5	1.32535	NMDCN000018T	MT903112		No
Taxon_286	Firmicutes	Clostridia	Clostridiales	Clostridiaceae	Clostridium difficile	GAMB_D4_73	1.31360	NMDCN000018U	MT903113		No
Taxon_287	Firmicutes	Clostridia	Clostridiales	Clostridiaceae	Romboutsia ilealis	1AT-D2-15	1.31285	NMDCN000018V	MT903114		No
Taxon_288	Firmicutes	Clostridia	Clostridiales	Clostridiaceae	Romboutsia timonensis	1AT-D10-92	1.31374	NMDCN0000190	MT903115	otu_582_V3V5/Medium priority	No
Taxon_289	Firmicutes	Clostridia	Clostridiales	Clostridiaceae	Terrisporobacter mayombei	ban5-GNNATD2-55	1.32962	NMDCN0000191	MT903116		No
Taxon_290	Firmicutes	Clostridia	Clostridiales	Eubacteriaceae	Anaerobutyricum hallii	2PAT-DE-D5-80	1.32963	NMDCN0000192	MT903117		No
Taxon_291	Firmicutes	Clostridia	Clostridiales	Eubacteriaceae	Anaerofustis stercorihominis	AT_D16_26	1.32389	NMDCN0000193	MT903118		No
Taxon_292	Firmicutes	Clostridia	Clostridiales	Eubacteriaceae	Emergencia timonensis	10-PN-D5-94	1.32577	NMDCN0000194	MT903119		No
Taxon_293	Firmicutes	Clostridia	Clostridiales	Eubacteriaceae	Eubacterium eligens	CP_GN_D16_12=2_YM_GN_D4_77.mj	1.31973	NMDCN0000195	MT903120		No
Taxon_294	Firmicutes	Clostridia	Clostridiales	Eubacteriaceae	Eubacterium callanderi	HP_D35_70	1.32401	NMDCN0000196	MT903121		No
Taxon_295	Firmicutes	Clostridia	Clostridiales	Eubacteriaceae	Eubacterium maltosivorans	L11	1.32964	NMDCN0000197	MT903122		No
Taxon_296	Firmicutes	Clostridia	Clostridiales	Eubacteriaceae	Eubacterium rectale	1PAT-DE-D5-19	1.31619	NMDCN0000198	MT903123		No
Taxon_297	Firmicutes	Clostridia	Clostridiales	Eubacteriaceae	Eubacterium siraeum	1AT-D10-84	1.31338	NMDCN0000199	MT903124		No
Taxon_298	Firmicutes	Clostridia	Clostridiales	Eubacteriaceae	Eubacterium ventriosum	cp1-sp-D3-64	1.32495	NMDCN000019A	MT903125		No
Taxon_299	Firmicutes	Clostridia	Clostridiales	Eubacteriaceae	Holdemanella biformis	13-RY-D5-38	1.32786	NMDCN000019B	MT903126		No
Taxon_300	Firmicutes	Clostridia	Clostridiales	Lachnospiraceae	Anaerostipes caccae	MBEF2-D3-3	1.31808	NMDCN000019C	MT903127		No
Taxon_301	Firmicutes	Clostridia	Clostridiales	Lachnospiraceae	Anaerostipes hadrus	Seq_ban3-VA-PN-D5-23	1.32965	NMDCN000019D	MT903128		No
Taxon_302	Firmicutes	Clostridia	Clostridiales	Lachnospiraceae	Coprococcus comes	35-RX-D5-13	1.32790	NMDCN000019E	MT903129		No
Taxon_303	Firmicutes	Clostridia	Clostridiales	Lachnospiraceae	Coprococcus eutactus	1AT-D10-24	1.32599	NMDCN000019F	MT903130		No
Taxon_304	Firmicutes	Clostridia	Clostridiales	Lachnospiraceae	Cuneatibacter caecimuris	4ZN-AT-D50-82	1.31924	NMDCN000019G	MT903131		No
Taxon_305	Firmicutes	Clostridia	Clostridiales	Lachnospiraceae	Dorea formicigenerans	ban6-CB-DE-D3-7	1.32966	NMDCN000019H	MT903132		No
Taxon_306	Firmicutes	Clostridia	Clostridiales	Lachnospiraceae	Dorea longicatena	5_CP_MRS_D4_33.mj	1.32507	NMDCN000019I	MT903133		No
Taxon_307	Firmicutes	Clostridia	Clostridiales	Lachnospiraceae	Drancourtella massiliensis	9-GN-D9-14	1.32582	NMDCN000019J	MT903134		No
Taxon_308	Firmicutes	Clostridia	Clostridiales	Lachnospiraceae	Faecalicatena contorta	CN-8	1.31982	NMDCN000019K	MT903135		No
Taxon_309	Firmicutes	Clostridia	Clostridiales	Lachnospiraceae	Lachnospira pectinoschiza	1AT-D10-75	1.31336	NMDCN000019L	MT903136		No
Taxon_310	Firmicutes	Clostridia	Clostridiales	Lachnospiraceae	Roseburia hominis	p8-44-X-T-D5	1.32630	NMDCN000019M	MT903137		No
Taxon_311	Firmicutes	Clostridia	Clostridiales	Lachnospiraceae	Roseburia faecis	p7-40-X-ATD-G-D5	1.32603	NMDCN000019N	MT903138		No
Taxon_312	Firmicutes	Clostridia	Clostridiales	Oscillospiraceae	Anaerotruncus colihominis	GNSAT_D7_73	1.32328	NMDCN000019O	MT903139		No
Taxon_313	Firmicutes	Clostridia	Clostridiales	Oscillospiraceae	Anaerotruncus rubiinfantis	CP_AT_DS_SB_D15_73	1.31966	NMDCN000019P	MT903140		No
Taxon_314	Firmicutes	Clostridia	Clostridiales	Oscillospiraceae	Blautia luti	1669_D10_84	1.32967	NMDCN000019Q	MT903141		No
Taxon_315	Firmicutes	Clostridia	Clostridiales	Oscillospiraceae	Blautia obeum	9AT-G-D3-40	1.32541	NMDCN000019R	MT903142		No
Taxon_316	Firmicutes	Clostridia	Clostridiales	Oscillospiraceae	Agathobaculum butyriciproducens	ban1-XN-KB3-D5-83	1.32735	NMDCN000019S	MT903143	otu_746_V1V3/High priority	No
Taxon_317	Firmicutes	Clostridia	Clostridiales	Oscillospiraceae	Dysosmobacter welbionis	n30	1.32968	NMDCN000019T	MT898669		No
Taxon_318	Firmicutes	Clostridia	Clostridiales	Oscillospiraceae	Faecalibacterium prausnitzii	ban1-V-X-D5-79	1.32770	NMDCN000019U	MT903144		No
Taxon_319	Firmicutes	Clostridia	Clostridiales	Oscillospiraceae	Harryflintia acetispora	1AT-D30-8	1.31380	NMDCN000019V	MT903145		No
Taxon_320	Firmicutes	Clostridia	Clostridiales	Oscillospiraceae	Intestinimonas butyriciproducens	5-CP1-AT-SP3-D3-26	1.32516	NMDCN0000200	MT903146		No
Taxon_321	Firmicutes	Clostridia	Clostridiales	Oscillospiraceae	Phocea massiliensis	CJIAFAT_53	1.32348	NMDCN0000201	MT903147	otu_796_V3V5/Medium priority	No
Taxon_322	Firmicutes	Clostridia	Clostridiales	Oscillospiraceae	Ruminococcus gnavus	GNAT_D16_87	1.32397	NMDCN0000202	MT903148		No
Taxon_323	Firmicutes	Clostridia	Clostridiales	Oscillospiraceae	Ruminococcus albus	1AT-D10-9	1.31329	NMDCN0000203	MT903149	otu_869_V3V5/Medium priority	No
Taxon_324	Firmicutes	Clostridia	Clostridiales	Oscillospiraceae	Ruminococcus bromii	1AT-D15-64	1.31346	NMDCN0000204	MT903150		No
Taxon_325	Firmicutes	Clostridia	Clostridiales	Oscillospiraceae	Ruminococcus faecis	10-PG-D9-77	1.32551	NMDCN0000205	MT903151		No
Taxon_326	Firmicutes	Clostridia	Clostridiales	Oscillospiraceae	Ruminococcus torques	2_YM_YCFA_1.mj	1.32475	NMDCN0000206	MT903152		No
Taxon_327	Firmicutes	Clostridia	Clostridiales	Oscillospiraceae	Ruthenibacterium lactatiformans	CC-9	1.32574	NMDCN0000207	MT903153	otu_696_V1V3/High priority	No
Taxon_328	Firmicutes	Clostridia	Clostridiales	Peptostreptococcaceae	Eubacterium tenue	GNFAT-D2-96	1.32324	NMDCN0000208	MT903154		No
Taxon_329	Firmicutes	Clostridia	Clostridiales	Peptostreptococcaceae	Paeniclostridium sordellii	ban3-VA-YN-D5-3	1.32728	NMDCN0000209	MT903155		No
Taxon_330	Firmicutes	Clostridia	Clostridiales	Peptostreptococcaceae	Peptostreptococcus stomatis	4_ZN_GAM_D10_20	1.32969	NMDCN000020A	MT903156		No
Taxon_331	Firmicutes	Clostridia	Clostridiales	Unclassified_Clostridiales	Blautia faecis	3_YM_SP_D4_11.mj	1.32486	NMDCN000020B	MT903157		No
Taxon_332	Firmicutes	Clostridia	Clostridiales	Unclassified_Clostridiales	Blautia producta	4BLK_dy_D2_64	1.31478	NMDCN000020C	MT903158		No
Taxon_333	Firmicutes	Clostridia	Clostridiales	Unclassified_Clostridiales	Blautia stercoris	3_YM_SP_D4_24.mj	1.32484	NMDCN000020D	MT903159		No
Taxon_334	Firmicutes	Clostridia	Clostridiales	Unclassified_Clostridiales	Blautia wexlerae	H1	1.32970	NMDCN000020E	MT903160		No
Taxon_335	Firmicutes	Clostridia	Clostridiales	Unclassified_Clostridiales	Blautia hydrogenotrophica	ban1-DG-D15-90	1.32971	NMDCN000020F	MT903161		No
Taxon_336	Firmicutes	Clostridia	Clostridiales	Unclassified_Clostridiales	Catabacter hongkongensis	HP_D35_67	1.32433	NMDCN000020G	MT903162		No
Taxon_337	Firmicutes	Clostridia	Clostridiales	Unclassified_Clostridiales	Finegoldia magna	FABB-D21-31	1.31395	NMDCN000020H	MT903163		No
Taxon_338	Firmicutes	Clostridia	Clostridiales	Unclassified_Clostridiales	Flavonifractor plautii	4_CP_SJ_64.mj	1.32500	NMDCN000020I	MT903164		No
Taxon_339	Firmicutes	Clostridia	Clostridiales	Unclassified_Clostridiales	Lawsonibacter asaccharolyticus	1-DE-D30-63	1.32972	NMDCN000020J	MT898677	otu_1041_V1V3/Medium priority	No
Taxon_340	Firmicutes	Clostridia	Clostridiales	Unclassified_Clostridiales	Muricomes intestini	ban-1-KB1-XN-13	1.32744	NMDCN000020K	MT903165		No
Taxon_341	Firmicutes	Clostridia	Clostridiales	Unclassified_Clostridiales	Pseudoflavonifractor capillosus	1PAT-DE-D5-23	1.32999	NMDCN000020L	MT903166		No
Taxon_342	Firmicutes	Clostridia	Clostridiales	Unclassified_Clostridiales	Tissierella praeacuta	W-41	1.31928	NMDCN000020M	MT903167		No
Taxon_343	Firmicutes	Erysipelotrichia	Erysipelotrichales	Erysipelotrichaceae	Catenibacterium mitsuokai	RP-D5-43	1.32731	NMDCN000020N	MT903168		No
Taxon_344	Firmicutes	Erysipelotrichia	Erysipelotrichales	Erysipelotrichaceae	Coprobacillus cateniformis	AT_D16_41=95	1.31992	NMDCN000020O	MT903169		No
Taxon_345	Firmicutes	Erysipelotrichia	Erysipelotrichales	Erysipelotrichaceae	Dielma fastidiosa	4GAM-DE-D20-26	1.32973	NMDCN000020P	MT903170		No
Taxon_346	Firmicutes	Erysipelotrichia	Erysipelotrichales	Erysipelotrichaceae	Faecalibacillus intestinalis	ban3_3GAM_DE_D3_79	1.32974	NMDCN000020Q	MT898679	otu_291_V3V5/Medium priority	No
Taxon_347	Firmicutes	Erysipelotrichia	Erysipelotrichales	Erysipelotrichaceae	Faecalibacillus faecis	2P_4	1.52480	NMDCN000020R	MT898678		No
Taxon_348	Firmicutes	Erysipelotrichia	Erysipelotrichales	Erysipelotrichaceae	Faecalitalea cylindroides	ban3_BLK_dy_D2_29	1.32975	NMDCN000020S	MT903171		No
Taxon_349	Firmicutes	Erysipelotrichia	Erysipelotrichales	Erysipelotrichaceae	Longibaculum muris	FABB_D4_48	1.31359	NMDCN000020T	MT903172		No
Taxon_350	Firmicutes	Erysipelotrichia	Erysipelotrichales	Erysipelotrichaceae	Longicatena caecimuris	4M3-GAM-D7-19	1.31912	NMDCN000020U	MT903173		No
Taxon_351	Firmicutes	Erysipelotrichia	Erysipelotrichales	Erysipelotrichaceae	Turicibacter sanguinis	p6-43-X-ATC-9-D5	1.32616	NMDCN000020V	MT903174		No
Taxon_352	Firmicutes	Negativicutes	Selenomonadales	Acidaminococcaceae	Acidaminococcus fermentans	9-D20-63	1.32649	NMDCN0000210	MT903175		No
Taxon_353	Firmicutes	Negativicutes	Selenomonadales	Acidaminococcaceae	Phascolarctobacterium faecium	1-DE-D30-67	1.32976	NMDCN0000211	MT903176	otu_134_V1V3/High priority	No
Taxon_354	Firmicutes	Negativicutes	Selenomonadales	Acidaminococcaceae	Phascolarctobacterium succinatutens	ban4-KP-D5-22	1.32977	NMDCN0000212	MT903177		No
Taxon_355	Firmicutes	Negativicutes	Selenomonadales	Selenomonadaceae	Megamonas funiformis	ban6-CB-DE-D3-27	1.32978	NMDCN0000213	MT903178		No
Taxon_356	Firmicutes	Negativicutes	Selenomonadales	Selenomonadaceae	Mitsuokella multacida	p4-22-X_9_D7	1.32589	NMDCN0000214	MT903179		No
Taxon_357	Firmicutes	Negativicutes	Selenomonadales	Veillonellaceae	Allisonella histaminiformans	ban5-RP-D5-46	1.32979	NMDCN0000215	MT903180		No
Taxon_358	Firmicutes	Negativicutes	Selenomonadales	Veillonellaceae	Dialister invisus	5CB-DE-D20-15	1.32980	NMDCN0000216	MT903181		No
Taxon_359	Firmicutes	Negativicutes	Selenomonadales	Veillonellaceae	Veillonella atypica	28_2	1.31260	NMDCN0000217	MT903182		No
Taxon_360	Firmicutes	Negativicutes	Selenomonadales	Veillonellaceae	Veillonella dispar	ban3-YM-bu-D12-86	1.32981	NMDCN0000218	MT903183		No
Taxon_361	Firmicutes	Negativicutes	Selenomonadales	Veillonellaceae	Veillonella parvula	28_7	1.31261	NMDCN0000219	MT903184		No
Taxon_362	Firmicutes	Negativicutes	Selenomonadales	Veillonellaceae	Veillonella rogosae	ban2_2PYGF_DE_D3_42-2	1.32982	NMDCN000021A	MT903185		No
Taxon_363	Firmicutes	Negativicutes	Selenomonadales	Veillonellaceae	Veillonella tobetsuensis	2-MRS-D20-DE-32	1.31631	NMDCN000021B	MT903186		No
Taxon_364	Firmicutes	Negativicutes	Veillonellales	Veillonellaceae	Dialister succinatiphilus	1-F3	1.32983	NMDCN000021C	MT903187		No
Taxon_365	Firmicutes	Negativicutes	Veillonellales	Veillonellaceae	Dialister intestinalis	L31	1.32984	NMDCN000021D	MT903188		No
Taxon_366	Firmicutes	Tissierellia	Tissierellales	Peptoniphilaceae	Peptoniphilus harei	1-DE-D40-21	1.32985	NMDCN000021E	MT903189		No
Taxon_367	Fusobacteria	Fusobacteriia	Fusobacteriales	Fusobacteriaceae	Cetobacterium somerae	BaF-D2-46	1.32316	NMDCN000021F	MT903190		No
Taxon_368	Fusobacteria	Fusobacteriia	Fusobacteriales	Fusobacteriaceae	Fusobacterium varium	FG-D1-8	1.31894	NMDCN000021G	MT903191		No
Taxon_369	Proteobacteria	Alphaproteobacteria	Rhizobiales	Hyphomicrobiaceae	Gemmiger formicilis	FAB_D4_2	1.31361	NMDCN000021H	MT903192		No
Taxon_370	Proteobacteria	Alphaproteobacteria	Rickettsiales	Rickettsiaceae	Rickettsia rhipicephali	ban2_DE_D90_PYG_39	1.32986	NMDCN000021I	MT903193		No
Taxon_371	Proteobacteria	Betaproteobacteria	Burkholderiales	Comamonadaceae	Comamonas testosteroni	ban1-vpn-D25-83	1.32987	NMDCN000021J	MT903194		No
Taxon_372	Proteobacteria	Betaproteobacteria	Burkholderiales	Ralstonia	Ralstonia pickettii	3-B3	1.32988	NMDCN000021K	MT903195		No
Taxon_373	Proteobacteria	Betaproteobacteria	Burkholderiales	Sutterellaceae	Mesosutterella multiformis	M30	1.32989	NMDCN000021L	MT898801		No
Taxon_374	Proteobacteria	Betaproteobacteria	Burkholderiales	Sutterellaceae	Parasutterella excrementihominis	6GAMF-DE-D20-16	1.32990	NMDCN000021M	MT903196		No
Taxon_375	Proteobacteria	Betaproteobacteria	Burkholderiales	Sutterellaceae	Sutterella wadsworthensis	1669B_D10_55	1.31716	NMDCN000021N	MT903197		No
Taxon_376	Proteobacteria	Deltaproteobacteria	Desulfovibrionales	Desulfovibrionaceae	Bilophila wadsworthia	BX9	1.32991	NMDCN000021O	MT898800		No
Taxon_377	Proteobacteria	Deltaproteobacteria	Desulfovibrionales	Desulfovibrionaceae	Desulfovibrio desulfuricans	ban1-PYG-W-D8-59	1.32748	NMDCN000021P	MT903198		No
Taxon_378	Proteobacteria	Gammaproteobacteria	Enterobacterales	Enterobacteriaceae	Kluyvera cryocrescens	ban1-75-NF-D2-11	1.32992	NMDCN000021Q	MT903199		No
Taxon_379	Proteobacteria	Gammaproteobacteria	Enterobacterales	Erwiniaceae	Pantoea agglomerans	Seq_9-P-D9-43	1.32993	NMDCN000021R	MT903200		No
Taxon_380	Proteobacteria	Gammaproteobacteria	Enterobacterales	Morganellaceae	Morganella morganii	3_YM_GAM_D4_92.mj	1.32457	NMDCN000021S	MT903201		No
Taxon_381	Proteobacteria	Gammaproteobacteria	Enterobacterales	Morganellaceae	Proteus mirabilis	MSR-D2-45	1.31921	NMDCN000021T	MT903202		No
Taxon_382	Proteobacteria	Gammaproteobacteria	Enterobacterales	Morganellaceae	Proteus vulgaris	reseq8_9	1.32994	NMDCN000021U	MT903203		No
Taxon_383	Proteobacteria	Gammaproteobacteria	Enterobacteriales	Enterobacteriaceae	Atlantibacter hermannii	GAMB-D21-78	1.31397	NMDCN000021V	MT903204		No
Taxon_384	Proteobacteria	Gammaproteobacteria	Enterobacteriales	Enterobacteriaceae	Enterobacter xiangfangensis	9-PYG-DE-D4-58	1.31592	NMDCN0000220	MT903205		No
Taxon_385	Proteobacteria	Gammaproteobacteria	Enterobacteriales	Enterobacteriaceae	Citrobacter braakii	RX-D5-6	1.32732	NMDCN0000221	MT903206		No
Taxon_386	Proteobacteria	Gammaproteobacteria	Enterobacteriales	Enterobacteriaceae	Citrobacter freundii	YN_17	1.32308	NMDCN0000222	MT903207		No
Taxon_387	Proteobacteria	Gammaproteobacteria	Enterobacteriales	Enterobacteriaceae	Citrobacter gillenii	FGjiaD2_2	1.31930	NMDCN0000223	MT903208		No
Taxon_388	Proteobacteria	Gammaproteobacteria	Enterobacteriales	Enterobacteriaceae	Citrobacter murliniae	Seq_ban6-VP-D25-67	1.32995	NMDCN0000224	MT903209		No
Taxon_389	Proteobacteria	Gammaproteobacteria	Enterobacteriales	Enterobacteriaceae	Cronobacter sakazakii	CP-XJ-D3-54	1.32412	NMDCN0000225	MT903210		No
Taxon_390	Proteobacteria	Gammaproteobacteria	Enterobacteriales	Enterobacteriaceae	Enterobacter asburiae	1-DE-D40-61	1.32996	NMDCN0000226	MT903211		No
Taxon_391	Proteobacteria	Gammaproteobacteria	Enterobacteriales	Enterobacteriaceae	Enterobacter hormaechei	FGjiaD2_9	1.31919	NMDCN0000227	MT903212		No
Taxon_392	Proteobacteria	Gammaproteobacteria	Enterobacteriales	Enterobacteriaceae	Enterobacter tabaci	CP_2E_D16_53	1.31970	NMDCN0000228	MT903213		No
Taxon_393	Proteobacteria	Gammaproteobacteria	Enterobacteriales	Enterobacteriaceae	Escherichia coli	3_PYGN_DE_D3_15	1.31532	NMDCN0000229	MT903214		No
Taxon_394	Proteobacteria	Gammaproteobacteria	Enterobacteriales	Enterobacteriaceae	Escherichia fergusonii	FG-D1-7	1.31893	NMDCN000022A	MT903215		No
Taxon_395	Proteobacteria	Gammaproteobacteria	Enterobacteriales	Enterobacteriaceae	Escherichia marmotae	DM-D1-50	1.31889	NMDCN000022B	MT903216		No
Taxon_396	Proteobacteria	Gammaproteobacteria	Enterobacteriales	Enterobacteriaceae	Klebsiella pneumoniae	CP_2E_73	1.32305	NMDCN000022C	MT903217		No
Taxon_397	Proteobacteria	Gammaproteobacteria	Enterobacteriales	Enterobacteriaceae	Klebsiella quasipneumoniae	CG-D2-1	1.31885	NMDCN000022D	MT903218		No
Taxon_398	Proteobacteria	Gammaproteobacteria	Enterobacteriales	Enterobacteriaceae	Shigella dysenteriae	6-CB-DE-D3-20	1.31535	NMDCN000022E	MT903219		No
Taxon_399	Proteobacteria	Gammaproteobacteria	Enterobacteriales	Enterobacteriaceae	Shigella flexneri	CP-XJ-D3-42	1.32409	NMDCN000022F	MT903220		No
Taxon_400	Proteobacteria	Gammaproteobacteria	Enterobacteriales	Enterobacteriaceae	Shigella sonnei	CP-XJ-D3-48	1.32410	NMDCN000022G	MT903221		No
Taxon_401	Proteobacteria	Gammaproteobacteria	Enterobacteriales	Enterobacteriaceae	Shigella boydii	4-CP1-AT-NB-D3-50	1.32402	NMDCN000022H	MT903222		No
Taxon_402	Proteobacteria	Gammaproteobacteria	Pseudomonadales	Pseudomonadaceae	Pseudomonas poae	ban3-KA2XN-4	1.32997	NMDCN000022I	Submitted		No
Taxon_403	Proteobacteria	Gammaproteobacteria;	Enterobacterales	Yersiniaceae	Serratia nematodiphila	BaF-D2-45	1.32357	NMDCN000022J	MT903223		No
Taxon_404	Verrucomicrobia	Verrucomicrobiae	Verrucomicrobiales	Akkermansiaceae	Akkermansia muciniphila	2SK-D10-15	1.31343	NMDCN000022K	MT903224		No

## Sheet: the rest 766 strains
Taxon Number	accessions	Strain ID	NMDC accession of 16S rRNA gene
Taxon_150	1.32821	NSJ-48	NMDCN0000114
Taxon_141	1.32812	NSJ-39	NMDCN0000111
Taxon_70	1.32864	L36	NMDCN0000126
Taxon_261	1.32822	NSJ-49	NMDCN000011J
Taxon_1	1.32658	ATB-D20-Y-67	NMDCN0000HUK
Taxon_1	1.32618	p4-10-X-ATB-Y-D5	NMDCN0000HUL
Taxon_101	1.31665	4-GAMF-DE-D3-80	NMDCN0000HUM
Taxon_102	1.31542	9-NA-DE-D4-16	NMDCN0000HUN
Taxon_102	1.31585	9-PYG-DE-D4-37	NMDCN0000HUO
Taxon_104	1.31715	1669B_D10_42	NMDCN0000HUP
Taxon_108	1.31832	5ZN-MRS-D5-16	NMDCN0000HUQ
Taxon_108	1.32315	ban4-BaF-D2-41	NMDCN0000HUR
Taxon_108	1.31945	CP_2E_D16_51	NMDCN0000HUS
Taxon_108	1.32429	YM-2216E-D3-56	NMDCN0000HUT
Taxon_108	1.31816	ZN-1669-D3-59	NMDCN0000HUU
Taxon_11	1.31376	1AT-D10-76	NMDCN0000HUV
Taxon_111	1.31396	GAM-D21-57	NMDCN0000HV0
Taxon_111	1.31610	3-DE-D30-47	NMDCN0000HV1
Taxon_111	1.31616	3AT_dyB_D6_62	NMDCN0000HV2
Taxon_111	1.31617	3AT_dyB_D6_50	NMDCN0000HV3
Taxon_111	1.31722	1669-D2-93	NMDCN0000HV4
Taxon_113	1.32327	MNR-D2-4	NMDCN0000HV5
Taxon_113	1.32371	1_SF_D13_12	NMDCN0000HV6
Taxon_113	1.32368	1_NG_D13_19	NMDCN0000HV7
Taxon_161	1.31989	YS_D14_64	NMDCN0000HV8
Taxon_114	1.32442	Y-CP-D3-22	NMDCN0000HV9
Taxon_114	1.32547	9_P_D3_62	NMDCN0000HVA
Taxon_114	1.32741	ban1-84-KS-7N-5-P	NMDCN0000HVB
Taxon_114	1.32439	CP-1669-D3-21	NMDCN0000HVC
Taxon_114	1.31645	8-MRS-DE-D4-77	NMDCN0000HVD
Taxon_114	1.32703	ban1-PYG-K-D8-92	NMDCN0000HVE
Taxon_114	1.32774	ban2-v-Y-D5-37	NMDCN0000HVF
Taxon_114	1.31629	3PYGN_DE_D3_25	NMDCN0000HVG
Taxon_116	1.31641	3_3GAM_DE_D3_43	NMDCN0000HVH
Taxon_116	1.31828	MBEF-D10-37	NMDCN0000HVI
Taxon_116	1.32354	3D7_8	NMDCN0000HVJ
Taxon_116	1.31265	26_16	NMDCN0000HVK
Taxon_399	1.32306	YM_SP_D4_19.mj	NMDCN0000HVL
Taxon_117	1.32536	ban3-YM-GAM-D12-22	NMDCN0000HVM
Taxon_117	1.32408	CP-1669-D3-31	NMDCN0000HVN
Taxon_117	1.31890	DM-D1-55	NMDCN0000HVO
Taxon_117	1.32520	5-CP1-AT-SP3-D3-40	NMDCN0000HVP
Taxon_117	1.31349	CB_D2_14	NMDCN0000HVQ
Taxon_117	1.32712	ban3-KX-8	NMDCN0000HVR
Taxon_117	1.32751	ban-2-WX-8	NMDCN0000HVS
Taxon_117	1.32763	ban2-27-KS-Y	NMDCN0000HVT
Taxon_117	1.32766	ban1-V-P-D5-1	NMDCN0000HVU
Taxon_117	1.32694	ban1-PYG-K-D8-91	NMDCN0000HVV
Taxon_117	1.31293	2BLK-D2-13	NMDCN0000I00
Taxon_117	1.31489	1BLK_dyB_D6_86	NMDCN0000I01
Taxon_117	1.31589	6-CB-DE-D3-43	NMDCN0000I02
Taxon_117	1.31264	27_33	NMDCN0000I03
Taxon_118	1.32517	5-CP1-AT-SP3-D3-27	NMDCN0000I04
Taxon_118	1.32443	CP-BU-D3-40	NMDCN0000I05
Taxon_118	1.31962	CP_AT_DS_SB_D15_52	NMDCN0000I06
Taxon_118	1.31508	1BLK_dy_D2_92	NMDCN0000I07
Taxon_118	1.32721	ban2-v-P-D5-60	NMDCN0000I08
Taxon_118	1.31294	2BLK-D2-14	NMDCN0000I09
Taxon_118	1.31272	27_68	NMDCN0000I0A
Taxon_119	1.31986	CN-12	NMDCN0000I0B
Taxon_119	1.32501	4_CP_SP_1.mj	NMDCN0000I0C
Taxon_121	1.32480	1_YM_1669_D3_37.mj	NMDCN0000I0D
Taxon_121	1.31985	CN-11	NMDCN0000I0E
Taxon_121	1.31984	CN-10	NMDCN0000I0F
Taxon_121	1.31578	1_AT_dyB_D15_45	NMDCN0000I0G
Taxon_121	1.31591	4-GAMF-DE-D3-57	NMDCN0000I0H
Taxon_121	1.32764	ban2-14-KS-X	NMDCN0000I0I
Taxon_121	1.32750	ban1-PYG-W-D8-67.seq	NMDCN0000I0J
Taxon_121	1.31855	5MBEF-MRS-D5-6	NMDCN0000I0K
Taxon_121	1.31268	4P_11	NMDCN0000I0L
Taxon_124	1.32704	ban1-PYG-W-D8-62	NMDCN0000I0M
Taxon_124	1.32705	ban1-PYG-W-D8-70	NMDCN0000I0N
Taxon_128	1.32524	ban1-6101-FNS-D20-49	NMDCN0000I0O
Taxon_128	1.32351	CJIAFAT_52	NMDCN0000I0P
Taxon_128	1.32674	CC-34	NMDCN0000I0Q
Taxon_128	1.31858	3-DE-D30-55	NMDCN0000I0R
Taxon_128	1.32756	ban-4-KG-6	NMDCN0000I0S
Taxon_128	1.32738	ban-2-WG-2	NMDCN0000I0T
Taxon_128	1.32788	17-RY-D5-50	NMDCN0000I0U
Taxon_128	1.32673	ban1-9-PN-D5-54	NMDCN0000I0V
Taxon_128	1.32468	YN-7=3D7_30	NMDCN0000I10
Taxon_128	1.31297	2SK-D2-10	NMDCN0000I11
Taxon_128	1.31256	28-16	NMDCN0000I12
Taxon_13	1.31332	1AT-D10-40	NMDCN0000I13
Taxon_130	1.31298	2SK-D2-12	NMDCN0000I14
Taxon_130	1.31513	2BLK_dy_D6_11	NMDCN0000I15
Taxon_132	1.32769	ban1-V-X-D5-75	NMDCN0000I16
Taxon_132	1.32746	ban1-PYG-W-D8-64	NMDCN0000I17
Taxon_134	1.31340	2BLK-D10-41	NMDCN0000I18
Taxon_136	1.32478	2_YM_GN_D4_71.mj	NMDCN0000I19
Taxon_136	1.32514	5-CP1-AT-SP3-D3-14	NMDCN0000I1A
Taxon_136	1.32544	9_G_D3_24	NMDCN0000I1B
Taxon_136	1.32406	4-CP1-AT-SP-D3-44	NMDCN0000I1C
Taxon_136	1.32347	YN_5	NMDCN0000I1D
Taxon_136	1.32473	Y-CP-D3-24	NMDCN0000I1E
Taxon_136	1.31344	3BLK-D12-40	NMDCN0000I1F
Taxon_136	1.31504	2_BLK_dy_D2_19	NMDCN0000I1G
Taxon_136	1.31505	1BLK_dy_D2_41	NMDCN0000I1H
Taxon_136	1.31999	CN-83	NMDCN0000I1I
Taxon_137	1.32526	ban1-6101-FNS-D20-76	NMDCN0000I1J
Taxon_137	1.32399	HP_D35_52	NMDCN0000I1K
Taxon_137	1.32394	GNNH_D7_73	NMDCN0000I1L
Taxon_137	1.32365	BAN1_D8_45=3D7_31	NMDCN0000I1M
Taxon_137	1.31304	3BLK-D2-24	NMDCN0000I1N
Taxon_137	1.31575	3_B1K_dyB_D15_26	NMDCN0000I1O
Taxon_137	1.31355	WC_D4_10	NMDCN0000I1P
Taxon_138	1.31267	2P_2	NMDCN0000I1Q
Taxon_139	1.32505	4_CP_SP_24.mj	NMDCN0000I1R
Taxon_139	1.32533	ban2-YF-D30-35	NMDCN0000I1S
Taxon_139	1.32499	4_CP_BG_44.mj	NMDCN0000I1T
Taxon_139	1.32383	3_YF_D14_1	NMDCN0000I1U
Taxon_139	1.32527	ban1-6101-FNS-D20-77	NMDCN0000I1V
Taxon_139	1.32418	Y-CP-D3-4	NMDCN0000I20
Taxon_139	1.31961	CP_AT_DS_NSB_D15_96	NMDCN0000I21
Taxon_139	1.32717	Seq_3-JCP-D80-36	NMDCN0000I22
Taxon_139	1.32720	ban2-v-P-D5-17	NMDCN0000I23
Taxon_139	1.31306	3BLK-D2-46	NMDCN0000I24
Taxon_139	1.31528	3_3GAM_DE_D3_40	NMDCN0000I25
Taxon_139	1.31568	5-CB-DE-D3-33	NMDCN0000I26
Taxon_246	1.31883	AM-D2-42	NMDCN0000I27
Taxon_140	1.32542	9_P_D3_58	NMDCN0000I28
Taxon_140	1.31470	1BLK_dy_D2_40	NMDCN0000I29
Taxon_140	1.31546	2_AT_dy_D15_22	NMDCN0000I2A
Taxon_140	1.32568	9-YN-D5-29	NMDCN0000I2B
Taxon_140	1.32578	10-G-D8-54	NMDCN0000I2C
Taxon_140	1.32640	p5-20-10-G	NMDCN0000I2D
Taxon_140	1.31479	1BLK_dyB_D6_8	NMDCN0000I2E
Taxon_140	1.32553	10-PG-D9-94	NMDCN0000I2F
Taxon_141	1.31480	2BLK_dy_D6_26	NMDCN0000I2G
Taxon_141	1.31468	1BLK_dy_D2_30	NMDCN0000I2H
Taxon_142	1.32529	ban1-1669N-D30-7	NMDCN0000I2I
Taxon_142	1.32471	3_YM_SP_D4_28.mj	NMDCN0000I2J
Taxon_142	1.32458	3_YM_SP_D4_18.mj	NMDCN0000I2K
Taxon_142	1.32423	CP-SP-D3-77	NMDCN0000I2L
Taxon_142	1.32422	CP-D2P-D3-64	NMDCN0000I2M
Taxon_142	1.31640	6GAMF-DE-D20-15	NMDCN0000I2N
Taxon_142	1.31262	27_41	NMDCN0000I2O
Taxon_394	1.32420	CP-FAB-D3-36	NMDCN0000I2P
Taxon_143	1.32370	1_NR_D13_47	NMDCN0000I2Q
Taxon_143	1.32437	4-CP1-AT-SP-D3-12	NMDCN0000I2R
Taxon_143	1.32379	2_NR_D15_24	NMDCN0000I2S
Taxon_143	1.32509	5-CP1-AT-SP2-D3-58	NMDCN0000I2T
Taxon_143	1.31552	3_3GAM_DE_D3_70	NMDCN0000I2U
Taxon_143	1.31636	4GAM-DE-D20-48	NMDCN0000I2V
Taxon_144	1.32483	CP-GAM-D3-69	NMDCN0000I30
Taxon_144	1.32494	1_SR_D15_51	NMDCN0000I31
Taxon_144	1.32441	CP-GAM-D3-66	NMDCN0000I32
Taxon_144	1.31530	3_3GAM_DE_D3_94	NMDCN0000I33
Taxon_144	1.31534	4-GAMF-DE-D3-58	NMDCN0000I34
Taxon_145	1.32302	CN-108	NMDCN0000I35
Taxon_145	1.31968	CP1_D15_6	NMDCN0000I36
Taxon_145	1.32346	YN_1	NMDCN0000I37
Taxon_145	1.32330	C_NH_D7_37	NMDCN0000I38
Taxon_145	1.32459	3_YM_SP_D4_26.mj	NMDCN0000I39
Taxon_145	1.32787	16-RY-D5-47	NMDCN0000I3A
Taxon_145	1.31720	2-DE-D55-44	NMDCN0000I3B
Taxon_146	1.32451	3_CP_F_D5_67.mj	NMDCN0000I3C
Taxon_146	1.32525	ban1-6101-FNS-D20-6	NMDCN0000I3D
Taxon_146	1.31980	CP_SP_D16_76	NMDCN0000I3E
Taxon_146	1.32380	2_NR_D15_30	NMDCN0000I3F
Taxon_146	1.31635	4GAM-DE-D20-27	NMDCN0000I3G
Taxon_146	1.32684	ban2-GN-W4-D5-20	NMDCN0000I3H
Taxon_146	1.32700	ban-1-KG-6-D15	NMDCN0000I3I
Taxon_147	1.31347	2BLK-D15-25	NMDCN0000I3J
Taxon_147	1.31537	8-CBN-DE-D4-24	NMDCN0000I3K
Taxon_147	1.31567	5-CB-DE-D3-13	NMDCN0000I3L
Taxon_147	1.32641	p2-81-9-AT-PN	NMDCN0000I3M
Taxon_148	1.32345	YN_11	NMDCN0000I3N
Taxon_148	1.31301	2SK-D2-63	NMDCN0000I3O
Taxon_148	1.31474	1BLK_dy_D2_78	NMDCN0000I3P
Taxon_148	1.31482	1BLK_dyB_D6_12	NMDCN0000I3Q
Taxon_150	1.32450	3_CP_F_D5_64.mj	NMDCN0000I3R
Taxon_150	1.32531	ban1-NC-D30-26	NMDCN0000I3S
Taxon_150	1.32403	4-CP1-AT-NB-D3-95	NMDCN0000I3T
Taxon_150	1.32417	Y-CP-D3-17	NMDCN0000I3U
Taxon_150	1.31965	CP_AT_DS_SB_D15_66	NMDCN0000I3V
Taxon_150	1.31475	1BLK_dy_D2_91	NMDCN0000I40
Taxon_150	1.31657	1B1K-dyB-D15-93	NMDCN0000I41
Taxon_150	1.32677	ban1-GN-KB2-D5-20	NMDCN0000I42
Taxon_150	1.31547	1_B1K_dyB_D15_93	NMDCN0000I43
Taxon_150	1.32707	ban-1-KBG-8	NMDCN0000I44
Taxon_154	1.32363	BAN1_D8_95	NMDCN0000I45
Taxon_151	1.32452	3_CP_MRS_D5_84.mj	NMDCN0000I46
Taxon_151	1.31323	4BLK-D5-85	NMDCN0000I47
Taxon_151	1.31469	1BLK_dy_D2_38	NMDCN0000I48
Taxon_151	1.31561	3_3GAM_DE_D3_46	NMDCN0000I49
Taxon_151	1.31266	4P_16	NMDCN0000I4A
Taxon_152	1.32528	ban1-6101-FNS-D20-78	NMDCN0000I4B
Taxon_152	1.32510	5-CP1-AT-SP2-D3-69	NMDCN0000I4C
Taxon_152	1.32575	10-G-D5-40	NMDCN0000I4D
Taxon_152	1.32440	CP-GAM-D3-58	NMDCN0000I4E
Taxon_152	1.32382	3_BAF_D14_34	NMDCN0000I4F
Taxon_152	1.32425	CP-BU-D3-12	NMDCN0000I4G
Taxon_152	1.32367	BAN1_D8_66--74	NMDCN0000I4H
Taxon_152	1.32333	C_NH_D7_22	NMDCN0000I4I
Taxon_152	1.31302	2SK-D2-69	NMDCN0000I4J
Taxon_152	1.31533	4-GAMF-DE-D3-47	NMDCN0000I4K
Taxon_152	1.32771	ban2-v-P-D5-31	NMDCN0000I4L
Taxon_152	1.32699	ban-1-KBG-5-D15	NMDCN0000I4M
Taxon_152	1.32708	ban-2-KG-5	NMDCN0000I4N
Taxon_152	1.32693	ban1-PYG-W-D8-60	NMDCN0000I4O
Taxon_152	1.32543	9_G_D3_32	NMDCN0000I4P
Taxon_152	1.32755	ban-4-KG-11	NMDCN0000I4Q
Taxon_152	1.31255	4-64	NMDCN0000I4R
Taxon_152	1.31263	4P_7	NMDCN0000I4S
Taxon_143	1.31253	4-60	NMDCN0000I4T
Taxon_268	1.31891	DM-D1-59	NMDCN0000I4U
Taxon_153	1.32537	ban3-YM-GAM-D12-32	NMDCN0000I4V
Taxon_153	1.32668	ban1-6101-FNS-D20-73	NMDCN0000I50
Taxon_153	1.32416	CP-GAM-D3-79	NMDCN0000I51
Taxon_153	1.32508	5-CP1-AT-SP2-D3-53	NMDCN0000I52
Taxon_153	1.32335	YF_D7_45	NMDCN0000I53
Taxon_153	1.32378	2_NR_D15_20	NMDCN0000I54
Taxon_153	1.31485	1BLK_dyB_D6_1	NMDCN0000I55
Taxon_153	1.31486	2BLK_dy_D6_47	NMDCN0000I56
Taxon_153	1.32702	ban-2-WG-8-D15	NMDCN0000I57
Taxon_153	1.32683	ban3-WX-D5-85	NMDCN0000I58
Taxon_154	1.32353	3D7_87	NMDCN0000I59
Taxon_154	1.32482	CP-GAM-D3-88	NMDCN0000I5A
Taxon_154	1.32334	C_NH_D7_46	NMDCN0000I5B
Taxon_154	1.32491	2_1669F_D14_55	NMDCN0000I5C
Taxon_154	1.31487	1BLK_dyB_D6_73	NMDCN0000I5D
Taxon_154	1.31488	2BLK_dy_D6_28	NMDCN0000I5E
Taxon_154	1.31506	2_BLK_dy_D2_48	NMDCN0000I5F
Taxon_117	1.32366	BAN1_D8_68=3D7_31	NMDCN0000I5G
Taxon_209	1.31896	DG-D1-65	NMDCN0000I5H
Taxon_16	1.32739	ban3-KA3XN-8	NMDCN0000I5I
Taxon_160	1.31543	9-NA-DE-D4-20	NMDCN0000I5J
Taxon_161	1.31491	1BLK_dyB_D6_45	NMDCN0000I5K
Taxon_162	1.31651	4GAM-DE-D20-63	NMDCN0000I5L
Taxon_162	1.31952	CP2-D15-SP-61	NMDCN0000I5M
Taxon_162	1.31955	CP-GAM-D15-44	NMDCN0000I5N
Taxon_162	1.31341	2BLK-D10-48	NMDCN0000I5O
Taxon_162	1.31372	FABB_D9_93	NMDCN0000I5P
Taxon_162	1.31650	4GAM-DE-D20-52	NMDCN0000I5Q
Taxon_162	1.31664	2-DE-D40-37	NMDCN0000I5R
Taxon_164	1.32534	ban2-YF-D30-37	NMDCN0000I5S
Taxon_164	1.32460	C_NH_D7_31	NMDCN0000I5T
Taxon_164	1.31958	CP_AT_DS_NSB_D15_88	NMDCN0000I5U
Taxon_164	1.31907	3M3-1669B-D7-58	NMDCN0000I5V
Taxon_164	1.31939	M3-D20-23	NMDCN0000I60
Taxon_164	1.31463	2SK-D30-89	NMDCN0000I61
Taxon_164	1.31626	3-DE-D30-90	NMDCN0000I62
Taxon_164	1.31817	ZN-GAM-D3-57	NMDCN0000I63
Taxon_164	1.32581	9-GN-D9-13	NMDCN0000I64
Taxon_164	1.32564	9-PN-D5-66	NMDCN0000I65
Taxon_164	1.32701	ban-2-KG-2-D15	NMDCN0000I66
Taxon_164	1.32580	9-G-D8-7	NMDCN0000I67
Taxon_164	1.32562	9-PN-D5-55	NMDCN0000I68
Taxon_164	1.32730	RY-D5-64	NMDCN0000I69
Taxon_164	1.31324	4CH-D5-4	NMDCN0000I6A
Taxon_164	1.31497	2BLK_dy_D6_24	NMDCN0000I6B
Taxon_164	1.31259	4_54	NMDCN0000I6C
Taxon_166	1.31303	3BLK-D2-22	NMDCN0000I6D
Taxon_166	1.31296	2SK-D2-6	NMDCN0000I6E
Taxon_167	1.32487	3_CP_GAM_D5_40.mj	NMDCN0000I6F
Taxon_167	1.31972	CP_B4_D16_92	NMDCN0000I6G
Taxon_167	1.31938	CM-D15-51	NMDCN0000I6H
Taxon_168	1.32479	1_YM_FAB_03_14.mj	NMDCN0000I6I
Taxon_168	1.31949	CP-D15-FAB-47	NMDCN0000I6J
Taxon_168	1.32546	9_G_D3_26	NMDCN0000I6K
Taxon_168	1.32595	p1-4-X-G-D7	NMDCN0000I6L
Taxon_168	1.32343	GNNH_D7_95	NMDCN0000I6M
Taxon_168	1.32349	YN_2	NMDCN0000I6N
Taxon_168	1.31498	2BLK_dy_D6_34	NMDCN0000I6O
Taxon_168	1.31600	3-DE-D30-69	NMDCN0000I6P
Taxon_168	1.32757	ban-4-W4GN-1	NMDCN0000I6Q
Taxon_168	1.32567	9-YN-D5-18	NMDCN0000I6R
Taxon_168	1.31269	27_23	NMDCN0000I6S
Taxon_169	1.31713	1669B_D10_27-2	NMDCN0000I6T
Taxon_169	1.31714	1669B_D10_27	NMDCN0000I6U
Taxon_171	1.32490	2_1669N_D14_84	NMDCN0000I6V
Taxon_171	1.32634	p1-34-X-Y-D7	NMDCN0000I70
Taxon_172	1.32666	ban1-6101-FNS-D20-23	NMDCN0000I71
Taxon_172	1.32352	3D7_40	NMDCN0000I72
Taxon_172	1.32369	1_NG_D13_24	NMDCN0000I73
Taxon_172	1.31718	1669_D10_8	NMDCN0000I74
Taxon_172	1.32758	ban-4-W4XN-6	NMDCN0000I75
Taxon_173	1.32493	1_NF_D15_85	NMDCN0000I76
Taxon_173	1.31342	2SK-D10-10	NMDCN0000I77
Taxon_173	1.31540	7-DE-D4-61	NMDCN0000I78
Taxon_173	1.31652	5CB-DE-D20-17	NMDCN0000I79
Taxon_173	1.31662	2-DE-D40-70	NMDCN0000I7A
Taxon_173	1.31666	2-DE-D40-57	NMDCN0000I7B
Taxon_176	1.32329	YF_D7_37	NMDCN0000I7C
Taxon_176	1.32384	3_YF_D14_11	NMDCN0000I7D
Taxon_176	1.31951	CP2-D15-bu-85	NMDCN0000I7E
Taxon_176	1.31977	CP_GN_D16_46	NMDCN0000I7F
Taxon_176	1.31586	3_GAM_DE_D3_92	NMDCN0000I7G
Taxon_176	1.32635	p1-25-X-Y-D7	NMDCN0000I7H
Taxon_176	1.32752	ban-2-WY-21	NMDCN0000I7I
Taxon_176	1.32754	ban-2-WY-8	NMDCN0000I7J
Taxon_176	1.31398	FABB-D21-13	NMDCN0000I7K
Taxon_176	1.31453	GAMB-D35-68	NMDCN0000I7L
Taxon_176	1.31454	GAM-D35-94	NMDCN0000I7M
Taxon_151	1.32331	C_NH_D7_38	NMDCN0000I7N
Taxon_144	1.31926	MNF-D2-22	NMDCN0000I7O
Taxon_179	1.31328	OD3_35	NMDCN0000I7P
Taxon_181	1.32682	ban3-WY-D5-91	NMDCN0000I7Q
Taxon_191	1.32783	ban3-VA-YN-D5-28	NMDCN0000I7R
Taxon_195	1.31988	CN-26	NMDCN0000I7S
Taxon_2	1.32655	ATB-D20-G-6	NMDCN0000I7T
Taxon_2	1.32620	p3-42-GH-D7	NMDCN0000I7U
Taxon_20	1.31377	1AT-D10-29	NMDCN0000I7V
Taxon_20	1.31364	1AT-D10-66	NMDCN0000I80
Taxon_20	1.31365	1AT-D10-83	NMDCN0000I81
Taxon_201	1.31500	3AT_dyB_D6_74	NMDCN0000I82
Taxon_202	1.32614	p1-1	NMDCN0000I83
Taxon_202	1.31352	GAM_D2_13	NMDCN0000I84
Taxon_202	1.31549	2_AT_dy_D15_38	NMDCN0000I85
Taxon_202	1.31501	3AT_dyB_D6_73	NMDCN0000I86
Taxon_203	1.31859	p3-41-GH-D7	NMDCN0000I87
Taxon_204	1.32396	AT_D16_23	NMDCN0000I88
Taxon_204	1.31369	WC_D9_1	NMDCN0000I89
Taxon_204	1.31729	pur-6	NMDCN0000I8A
Taxon_205	1.31502	1BLK_dyB_D6_7	NMDCN0000I8B
Taxon_206	1.32310	YF_3	NMDCN0000I8C
Taxon_206	1.31906	3M3-1669B-D7-57	NMDCN0000I8D
Taxon_206	1.31798	MBEF-MGAM-D3-2	NMDCN0000I8E
Taxon_206	1.32645	p8-49-CP2	NMDCN0000I8F
Taxon_206	1.31827	MBEF-D10-36	NMDCN0000I8G
Taxon_206	1.32796	27-X-3-A4	NMDCN0000I8H
Taxon_207	1.32522	ban1-6101-FNS-D20-37	NMDCN0000I8I
Taxon_207	1.32725	ban3-VA-XN-D5-24	NMDCN0000I8J
Taxon_207	1.31524	1_1MRS_DE_D3_65	NMDCN0000I8K
Taxon_207	1.31556	9-NA-DE-D4-8	NMDCN0000I8L
Taxon_208	1.32687	ban1-YN-KB2-D5-35	NMDCN0000I8M
Taxon_208	1.31494	2BLK_dy_D6_4	NMDCN0000I8N
Taxon_208	1.31557	9-NA-DE-D4-9	NMDCN0000I8O
Taxon_208	1.31295	2BLK-D2-63	NMDCN0000I8P
Taxon_209	1.32430	YM-2216E-D3-60	NMDCN0000I8Q
Taxon_209	1.31523	1_1MRS_DE_D3_61	NMDCN0000I8R
Taxon_209	1.31570	5-CB-DE-D3-44	NMDCN0000I8S
Taxon_210	1.32338	1669S_D7_15	NMDCN0000I8T
Taxon_210	1.32356	MSR-D2-53	NMDCN0000I8U
Taxon_211	1.32376	2_1669N_D14_77	NMDCN0000I8V
Taxon_211	1.32456	3_YM_GAM_D4_90.mj	NMDCN0000I90
Taxon_212	1.31814	MBEF2-D3-43	NMDCN0000I91
Taxon_213	1.31887	AM-D2-53	NMDCN0000I92
Taxon_213	1.32313	MSR-D2-21	NMDCN0000I93
Taxon_217	1.32342	GNNH_D7_96	NMDCN0000I94
Taxon_217	1.31649	1MRS_DE_D3_45	NMDCN0000I95
Taxon_218	1.32438	4-CP1-AT-SP-D3-48	NMDCN0000I96
Taxon_219	1.32435	HP_D35_90	NMDCN0000I97
Taxon_219	1.31594	1_MRS_DE_D3_49	NMDCN0000I98
Taxon_219	1.31643	1_MRS_DE_D3_2	NMDCN0000I99
Taxon_269	1.31623	8-CBN-DE-D4-19	NMDCN0000I9A
Taxon_22	1.31466	FAT-D35-36	NMDCN0000I9B
Taxon_221	1.31518	1_1MRS_DE_D3_18	NMDCN0000I9C
Taxon_221	1.31522	1_1MRS_DE_D3_6	NMDCN0000I9D
Taxon_222	1.32665	4-CP1-AT-SP-D3-28	NMDCN0000I9E
Taxon_222	1.31974	CP_GN_D16_21	NMDCN0000I9F
Taxon_223	1.31660	3-DE-D45-59	NMDCN0000I9G
Taxon_224	1.32362	BAN1_D8_82	NMDCN0000I9H
Taxon_224	1.31584	8-MRS-DE-D4-66	NMDCN0000I9I
Taxon_224	1.32650	9-D20-87	NMDCN0000I9J
Taxon_224	1.32785	8-RY-D5-17	NMDCN0000I9K
Taxon_137	1.32364	BAN1_D8_60=3D7_31	NMDCN0000I9L
Taxon_225	1.32540	ban4-YM-SP-D12-87	NMDCN0000I9M
Taxon_225	1.32444	YM-2216E-D3-69	NMDCN0000I9N
Taxon_225	1.32428	YM-2216E-D3-54	NMDCN0000I9O
Taxon_225	1.31588	3_GAM_DE_D3_63	NMDCN0000I9P
Taxon_225	1.31633	2-PYGF-D20-DE-62	NMDCN0000I9Q
Taxon_225	1.31642	1_1MRS_DE_D3_14	NMDCN0000I9R
Taxon_225	1.32000	CN-102	NMDCN0000I9S
Taxon_235	1.31601	3GAM_DE_D3_50	NMDCN0000I9T
Taxon_236	1.32651	G-D20-10	NMDCN0000I9U
Taxon_237	1.32538	ban4-YM-FAB-D12-4	NMDCN0000I9V
Taxon_237	1.32448	2_YM_XJ_35.mj	NMDCN0000IA0
Taxon_237	1.31959	CP_AT_DS_NSB_D15_93	NMDCN0000IA1
Taxon_237	1.32455	3_YM_GAM_D4_79.mj	NMDCN0000IA2
Taxon_237	1.31960	CP_AT_DS_NSB_D15_94	NMDCN0000IA3
Taxon_237	1.31998	CN-42	NMDCN0000IA4
Taxon_237	1.32426	YM-2216E-D3-49	NMDCN0000IA5
Taxon_237	1.32427	YM-2216E-D3-51	NMDCN0000IA6
Taxon_237	1.32637	p4-9-X_9_D7	NMDCN0000IA7
Taxon_238	1.31541	8-MRS-DE-D4-75	NMDCN0000IA8
Taxon_238	1.31536	8-CBN-DE-D4-1	NMDCN0000IA9
Taxon_241	1.32431	YM-2216E-D3-66	NMDCN0000IAA
Taxon_241	1.31582	4-GAMF-DE-D3-43	NMDCN0000IAB
Taxon_241	1.31587	1_MRS_DE_D3_55	NMDCN0000IAC
Taxon_241	1.32719	ban1-V-X-D5-68	NMDCN0000IAD
Taxon_241	1.31550	3_B1K_dyB_D15_29	NMDCN0000IAE
Taxon_243	1.32320	GNNH-D2-73	NMDCN0000IAF
Taxon_243	1.31979	CP_SP_D16_68	NMDCN0000IAG
Taxon_243	1.31971	CP_2E_D16_54	NMDCN0000IAH
Taxon_243	1.32413	CP-GAM-D3-59	NMDCN0000IAI
Taxon_244	1.31566	4-GAMF-DE-D3-95	NMDCN0000IAJ
Taxon_244	1.31604	1_MRS_DE_D3_69	NMDCN0000IAK
Taxon_244	1.32355	3D7_25	NMDCN0000IAL
Taxon_245	1.31564	4-GAMF-DE-D3-69	NMDCN0000IAM
Taxon_246	1.32309	1669_NH_5	NMDCN0000IAN
Taxon_246	1.31882	EM-D1-25	NMDCN0000IAO
Taxon_246	1.32615	p4-7-X_9_D7	NMDCN0000IAP
Taxon_246	1.32375	2_1669N_D14_76	NMDCN0000IAQ
Taxon_247	1.32498	4_CP_BG_35.mj	NMDCN0000IAR
Taxon_247	1.31519	1_1MRS_DE_D3_24	NMDCN0000IAS
Taxon_247	1.31527	3_3GAM_DE_D3_37	NMDCN0000IAT
Taxon_249	1.31818	ZN-GAM-D3-65	NMDCN0000IAU
Taxon_25	1.32591	p3-19-X-YNH-D7	NMDCN0000IAV
Taxon_25	1.32592	p4-2-X-ATB-Y-D5	NMDCN0000IB0
Taxon_250	1.32609	p1-33-X-Y-D7	NMDCN0000IB1
Taxon_250	1.31903	DG-D3-84	NMDCN0000IB2
Taxon_250	1.32434	HP_D35_71	NMDCN0000IB3
Taxon_250	1.31929	FG-D15-1	NMDCN0000IB4
Taxon_250	1.31464	GAMB-D35-69	NMDCN0000IB5
Taxon_251	1.31987	CN-23	NMDCN0000IB6
Taxon_251	1.31830	2-Znew-17	NMDCN0000IB7
Taxon_251	1.31545	1_B1K_dyB_D15_85	NMDCN0000IB8
Taxon_251	1.31598	1-DE-D30-8	NMDCN0000IB9
Taxon_251	1.31597	1-DE-D30-84	NMDCN0000IBA
Taxon_251	1.31353	GAM_D2_18	NMDCN0000IBB
Taxon_252	1.31733	bb_D4_48	NMDCN0000IBC
Taxon_252	1.31806	ZN-AT-D3-33	NMDCN0000IBD
Taxon_253	1.31802	ZN-AT-D3-17	NMDCN0000IBE
Taxon_253	1.31803	ZN-AT-D3-31	NMDCN0000IBF
Taxon_256	1.31738	pur-37	NMDCN0000IBG
Taxon_256	1.32727	ban3-VA-YN-D5-16	NMDCN0000IBH
Taxon_257	1.32729	RY-D5-11	NMDCN0000IBI
Taxon_261	1.31943	CP1_D15_3	NMDCN0000IBJ
Taxon_261	1.32472	3_YM_SP_D4_17.mj	NMDCN0000IBK
Taxon_261	1.31632	2-PYGF-D20-DE-51	NMDCN0000IBL
Taxon_262	1.31915	M3-D20-64	NMDCN0000IBM
Taxon_262	1.31911	4M3-1669B-D7-1	NMDCN0000IBN
Taxon_262	1.31348	FAT_D2_7	NMDCN0000IBO
Taxon_262	1.31569	5-CB-DE-D3-36	NMDCN0000IBP
Taxon_262	1.31573	9-PYG-DE-D4-85	NMDCN0000IBQ
Taxon_262	1.31804	ZN-AT-D3-43	NMDCN0000IBR
Taxon_262	1.31819	MBEF-MGAM-D3-16	NMDCN0000IBS
Taxon_262	1.31825	MBEF-D10-33	NMDCN0000IBT
Taxon_262	1.32722	ban2-v-Y-D5-12	NMDCN0000IBU
Taxon_263	1.31624	2CBN-DE-D5-38	NMDCN0000IBV
Taxon_264	1.32662	ATD-D20-G-6	NMDCN0000IC0
Taxon_265	1.32794	21-X-3X1-14	NMDCN0000IC1
Taxon_267	1.32685	ban2-YN-W3-D5-5	NMDCN0000IC2
Taxon_267	1.32734	RAT-XN-D5-34	NMDCN0000IC3
Taxon_267	1.31957	CP_AT_DS_NSB_D15_80	NMDCN0000IC4
Taxon_267	1.31659	4-DE-D45-9	NMDCN0000IC5
Taxon_267	1.31813	ZN-AT-D3-36	NMDCN0000IC6
Taxon_267	1.32695	ban1-PYG-WN-D8-8	NMDCN0000IC7
Taxon_128	1.31857	2-DE-D40-11	NMDCN0000IC8
Taxon_268	1.31492	4AT_dy_D6_59	NMDCN0000IC9
Taxon_268	1.31509	4AT_dy_D2_10	NMDCN0000ICA
Taxon_268	1.31510	4AT_dy_D2_4	NMDCN0000ICB
Taxon_399	1.31892	DM-D1-62	NMDCN0000ICC
Taxon_269	1.32359	C-FAT-D2-78	NMDCN0000ICD
Taxon_269	1.32336	GNFH_D7_31	NMDCN0000ICE
Taxon_269	1.31940	CP_AT_DS_SB_D15_36	NMDCN0000ICF
Taxon_269	1.31606	4_AT_dy_D2_47	NMDCN0000ICG
Taxon_269	1.32706	ban-1-KA2-XN-19	NMDCN0000ICH
Taxon_269	1.31287	1AT-D2-32	NMDCN0000ICI
Taxon_269	1.31512	3AT_dyB_D6_47	NMDCN0000ICJ
Taxon_269	1.31291	1AT-D2-78	NMDCN0000ICK
Taxon_219	1.31897	DM-D1-40	NMDCN0000ICL
Taxon_270	1.31734	bb_D4_49	NMDCN0000ICM
Taxon_270	1.32566	9-YN-D5-16	NMDCN0000ICN
Taxon_272	1.32504	4_CP_SP_19.mj	NMDCN0000ICO
Taxon_272	1.32415	CP-GAM-D3-74	NMDCN0000ICP
Taxon_272	1.32497	4_CP_BG_27.mj	NMDCN0000ICQ
Taxon_272	1.31493	1BLK_dyB_D6_72	NMDCN0000ICR
Taxon_272	1.31565	4-GAMF-DE-D3-90	NMDCN0000ICS
Taxon_272	1.31826	MBEF-D10-35	NMDCN0000ICT
Taxon_272	1.32724	ban2-v-Y-D5-34	NMDCN0000ICU
Taxon_272	1.31908	3M3-1669B-D7-91	NMDCN0000ICV
Taxon_273	1.32386	AT_D16_1	NMDCN0000ID0
Taxon_273	1.31477	4AT_dy_D2_1	NMDCN0000ID1
Taxon_273	1.31538	8-CBN-DE-D4-9	NMDCN0000ID2
Taxon_273	1.32698	ban-1-KB3-GN-1-D15	NMDCN0000ID3
Taxon_277	1.31320	1AT-D5-34	NMDCN0000ID4
Taxon_277	1.31590	8-MRS-DE-D4-85	NMDCN0000ID5
Taxon_277	1.32686	ban1-GN-KB3-D5-49	NMDCN0000ID6
Taxon_277	1.32778	ban3-VA-PN-D5-28	NMDCN0000ID7
Taxon_278	1.32407	CP-1669-D3-16	NMDCN0000ID8
Taxon_278	1.32424	CP-BU-D3-10	NMDCN0000ID9
Taxon_278	1.31289	1AT-D2-58	NMDCN0000IDA
Taxon_278	1.31799	MBEF-MGAM-D3-25	NMDCN0000IDB
Taxon_278	1.31815	MBEF2-D3-23	NMDCN0000IDC
Taxon_28	1.31484	1BLK_dyB_D6_14	NMDCN0000IDD
Taxon_28	1.31576	2_AT_dy_D15_23	NMDCN0000IDE
Taxon_28	1.31483	2BLK_dy_D6_12	NMDCN0000IDF
Taxon_28	1.31927	CM-D15-53	NMDCN0000IDG
Taxon_28	1.31937	CM-D15-55	NMDCN0000IDH
Taxon_280	1.31531	3_PYGN_DE_D3_11	NMDCN0000IDI
Taxon_280	1.32680	ban3-KA3-GN-D5-22	NMDCN0000IDJ
Taxon_280	1.31554	9-NA-DE-D4-29	NMDCN0000IDK
Taxon_282	1.32690	ban3-GN-KA1-D5-51	NMDCN0000IDL
Taxon_283	1.31319	1AT-D5-27	NMDCN0000IDM
Taxon_283	1.31599	3-DE-D30-10	NMDCN0000IDN
Taxon_283	1.31496	4AT_dy_D6_49	NMDCN0000IDO
Taxon_283	1.31515	4AT_dy_D6_34	NMDCN0000IDP
Taxon_284	1.32390	AT_D16_36	NMDCN0000IDQ
Taxon_284	1.32381	2_SR_D15_8	NMDCN0000IDR
Taxon_284	1.32314	SR_D2_26	NMDCN0000IDS
Taxon_284	1.31539	8-MRS-DE-D4-50	NMDCN0000IDT
Taxon_284	1.32691	ban1-YN-KB3-D5-78	NMDCN0000IDU
Taxon_285	1.31351	FABB_D2_51	NMDCN0000IDV
Taxon_285	1.31553	8-CBN-DE-D4-46	NMDCN0000IE0
Taxon_285	1.31555	9-NA-DE-D4-36	NMDCN0000IE1
Taxon_285	1.31920	MSR-D2-26	NMDCN0000IE2
Taxon_285	1.31914	DE-D120-6	NMDCN0000IE3
Taxon_285	1.32419	Y-CP-D3-7	NMDCN0000IE4
Taxon_285	1.31823	Znew-2	NMDCN0000IE5
Taxon_285	1.31918	CY-D3-6	NMDCN0000IE6
Taxon_285	1.32726	ban3-VA-YN-D5-10	NMDCN0000IE7
Taxon_292	1.31901	DAT-D3-49	NMDCN0000IE8
Taxon_292	1.32337	GNSH_D7_8	NMDCN0000IE9
Taxon_292	1.31472	1BLK_dy_D2_59	NMDCN0000IEA
Taxon_292	1.31495	2BLK_dy_D6_37	NMDCN0000IEB
Taxon_292	1.31580	2_BLK_dy_D6_49	NMDCN0000IEC
Taxon_292	1.32653	ATB-D20-G-34	NMDCN0000IED
Taxon_293	1.31618	2PAT-DE-D5-44	NMDCN0000IEE
Taxon_293	1.32747	ban1-PYG-WN-D8-16	NMDCN0000IEF
Taxon_293	1.32775	ban3-VA-PN-D5-13	NMDCN0000IEG
Taxon_293	1.32779	ban3-VA-XN-D5-16	NMDCN0000IEH
Taxon_294	1.31900	DG-D3-90	NMDCN0000IEI
Taxon_294	1.32373	1_NF_D15_75	NMDCN0000IEJ
Taxon_294	1.32398	HP_D35_51	NMDCN0000IEK
Taxon_294	1.31730	bb_D4_17	NMDCN0000IEL
Taxon_294	1.31731	bb_D4_18	NMDCN0000IEM
Taxon_294	1.31899	CM-D3-20	NMDCN0000IEN
Taxon_294	1.31916	CM-D14-46	NMDCN0000IEO
Taxon_296	1.31620	1PAT-DE-D5-28	NMDCN0000IEP
Taxon_296	1.32767	ban1-V-P-D5-4	NMDCN0000IEQ
Taxon_30	1.31608	4-B1K-dyB-D15-56	NMDCN0000IER
Taxon_30	1.32737	ban-2-KY-14	NMDCN0000IES
Taxon_302	1.31717	1669-D2-94	NMDCN0000IET
Taxon_302	1.31271	27_67	NMDCN0000IEU
Taxon_303	1.31378	1AT-D10-24	NMDCN0000IEV
Taxon_304	1.31820	ZN-AT-D3-20	NMDCN0000IF0
Taxon_304	1.31821	ZN-AT-D3-32	NMDCN0000IF1
Taxon_306	1.31321	1AT-D5-48	NMDCN0000IF2
Taxon_306	1.32642	p7-45-9-P	NMDCN0000IF3
Taxon_307	1.32611	p2-45-X-ATA-9-D5	NMDCN0000IF4
Taxon_307	1.32670	ban1-GHHAT-D30-82	NMDCN0000IF5
Taxon_307	1.32557	9-AT-GN-D9-48	NMDCN0000IF6
Taxon_307	1.31931	4ZN-AT-D50-65	NMDCN0000IF7
Taxon_307	1.32584	9-GN-D9-6	NMDCN0000IF8
Taxon_307	1.32643	p1-4-AT-GN	NMDCN0000IF9
Taxon_308	1.31983	CN-9	NMDCN0000IFA
Taxon_308	1.32689	ban3-GN-KA3-D5-15	NMDCN0000IFB
Taxon_308	1.31317	1AT-D5-21	NMDCN0000IFC
Taxon_308	1.31625	3-DE-D30-3	NMDCN0000IFD
Taxon_308	1.31603	9-PYG-DE-D4-39	NMDCN0000IFE
Taxon_31	1.32661	ATD-D20-G-4	NMDCN0000IFF
Taxon_312	1.32387	AT_D16_20	NMDCN0000IFG
Taxon_312	1.32671	ban1-GHSAT-D30-52	NMDCN0000IFH
Taxon_312	1.32388	AT_D16_21	NMDCN0000IFI
Taxon_312	1.31969	CP2_AT_DS_SB_D15_46	NMDCN0000IFJ
Taxon_312	1.32606	p7-28-X-ATD-G-D5	NMDCN0000IFK
Taxon_312	1.31370	FATB_D9_80	NMDCN0000IFL
Taxon_312	1.31621	2PAT-DE-D5-49	NMDCN0000IFM
Taxon_313	1.31967	CP_AT_DS_SB_D15_81	NMDCN0000IFN
Taxon_313	1.31964	CP_AT_DS_SB_D15_64	NMDCN0000IFO
Taxon_315	1.32619	p6-10-X-ATC-Y-D5	NMDCN0000IFP
Taxon_315	1.32301	CN-104	NMDCN0000IFQ
Taxon_317	1.31331	1AT-D10-38	NMDCN0000IFR
Taxon_317	1.31357	FAT_D4_3	NMDCN0000IFS
Taxon_317	1.31373	FAT_D9_65	NMDCN0000IFT
Taxon_320	1.32515	5-CP1-AT-SP3-D3-16	NMDCN0000IFU
Taxon_320	1.31975	CP_GN_D16_34	NMDCN0000IFV
Taxon_320	1.31902	DG-D3-82	NMDCN0000IG0
Taxon_320	1.32341	C_SAT_D7_82	NMDCN0000IG1
Taxon_320	1.32613	p4-23-X-ATB-Y-D5	NMDCN0000IG2
Taxon_320	1.32344	C_SAT_D7_83	NMDCN0000IG3
Taxon_320	1.32350	CJIAFAT_55	NMDCN0000IG4
Taxon_320	1.31400	FAT-D35-33	NMDCN0000IG5
Taxon_320	1.32572	CC-42	NMDCN0000IG6
Taxon_320	1.32654	ATB-D20-G-49	NMDCN0000IG7
Taxon_320	1.32660	ATC-D20-G-16	NMDCN0000IG8
Taxon_206	1.32799	30-X-3-A6	NMDCN0000IG9
Taxon_321	1.31936	4ZN-AT-D50-79	NMDCN0000IGA
Taxon_322	1.32789	19-RY-D5-57	NMDCN0000IGB
Taxon_322	1.32405	4-CP1-AT-SP-D3-37	NMDCN0000IGC
Taxon_322	1.32561	9-PN-D5-51	NMDCN0000IGD
Taxon_322	1.31596	1PAT-DE-D5-78	NMDCN0000IGE
Taxon_322	1.32710	ban3-KA2YN-1	NMDCN0000IGF
Taxon_322	1.32554	9-AT-GN-D9-21	NMDCN0000IGG
Taxon_322	1.32681	ban3-XN-KA2-D5-45	NMDCN0000IGH
Taxon_322	1.32563	9-PN-D5-57	NMDCN0000IGI
Taxon_322	1.32565	9-PN-D5-79	NMDCN0000IGJ
Taxon_322	1.32570	10-GN-GP-D9-53	NMDCN0000IGK
Taxon_323	1.32761	ban1-50-KSATO-2-PN	NMDCN0000IGL
Taxon_323	1.31318	1AT-D5-23	NMDCN0000IGM
Taxon_323	1.31254	27-36	NMDCN0000IGN
Taxon_324	1.31258	27_1	NMDCN0000IGO
Taxon_326	1.32489	3_CP_F_D5_65.mj	NMDCN0000IGP
Taxon_326	1.32555	9-AT-GN-D9-23	NMDCN0000IGQ
Taxon_326	1.32503	4_CP_SP_14.mj	NMDCN0000IGR
Taxon_326	1.32765	Seq_2-PN-K-D15-37	NMDCN0000IGS
Taxon_326	1.31270	28_12	NMDCN0000IGT
Taxon_327	1.32476	2_YM_YCFA_24.mj	NMDCN0000IGU
Taxon_327	1.31609	2BLK_dy_D6_2	NMDCN0000IGV
Taxon_327	1.32638	p4-25-X-Y-D7	NMDCN0000IH0
Taxon_327	1.32659	ATB-D20-Y-69	NMDCN0000IH1
Taxon_327	1.32749	ban1-PYG-W-D8-61	NMDCN0000IH2
Taxon_327	1.32753	ban-2-WY-7	NMDCN0000IH3
Taxon_327	1.32656	ATB-D20-Y-65	NMDCN0000IH4
Taxon_327	1.32784	2-RY-D5-8	NMDCN0000IH5
Taxon_329	1.32715	ban2-46-KS-YN	NMDCN0000IH6
Taxon_331	1.32485	2_YM_GN_D4_90.mj	NMDCN0000IH7
Taxon_332	1.31732	bb_D4_19	NMDCN0000IH8
Taxon_336	1.31615	1BLK_dyB_D6_54	NMDCN0000IH9
Taxon_336	1.31932	DG-D3-91	NMDCN0000IHA
Taxon_336	1.31904	DG-D3-85	NMDCN0000IHB
Taxon_336	1.31345	4CH-D12-65	NMDCN0000IHC
Taxon_338	1.32339	C_SAT_D7_76	NMDCN0000IHD
Taxon_338	1.32332	C_SAT_D7_80	NMDCN0000IHE
Taxon_338	1.31925	4ZN-AT-D50-81	NMDCN0000IHF
Taxon_338	1.31922	4ZN-AT-D50-70	NMDCN0000IHG
Taxon_338	1.32340	GNSAT_D7_70	NMDCN0000IHH
Taxon_338	1.32432	GNAT_D16_77	NMDCN0000IHI
Taxon_338	1.32519	5-CP1-AT-SP3-D3-39	NMDCN0000IHJ
Taxon_338	1.32392	AT_D16_40	NMDCN0000IHK
Taxon_338	1.31339	1AT-D10-89	NMDCN0000IHL
Taxon_338	1.31516	4AT_dy_D2_53	NMDCN0000IHM
Taxon_338	1.31614	4AT_dy_D6_10	NMDCN0000IHN
Taxon_338	1.31647	1PAT-DE-D5-13	NMDCN0000IHO
Taxon_338	1.32573	CC-45	NMDCN0000IHP
Taxon_338	1.32776	ban3-VA-PN-D5-16	NMDCN0000IHQ
Taxon_338	1.32745	ban3-GN-KA2-D5-37	NMDCN0000IHR
Taxon_338	1.31607	1-DE-D30-56	NMDCN0000IHS
Taxon_338	1.31656	1DE-D30-56	NMDCN0000IHT
Taxon_338	1.32797	28-X-3-A9	NMDCN0000IHU
Taxon_141	1.31562	3_3GAM_DE_D3_78	NMDCN0000IHV
Taxon_344	1.32325	GNNAT-D2-62	NMDCN0000II0
Taxon_344	1.32391	AT_D16_37	NMDCN0000II1
Taxon_344	1.31905	3M3-1669B-D7-33	NMDCN0000II2
Taxon_349	1.31602	5-CB-DE-D3-30	NMDCN0000II3
Taxon_351	1.31284	1AT-D2-10	NMDCN0000II4
Taxon_351	1.31507	4AT_dy_D2_2	NMDCN0000II5
Taxon_351	1.31511	4AT_dy_D2_15	NMDCN0000II6
Taxon_351	1.32781	ban3-VA-XN-D5-20	NMDCN0000II7
Taxon_351	1.31503	3AT_dyB_D6_30	NMDCN0000II8
Taxon_356	1.32588	p1-11-X-G-D7	NMDCN0000II9
Taxon_356	1.32625	p2-48-X_9_D7	NMDCN0000IIA
Taxon_356	1.32626	p2-36-X_9_D7	NMDCN0000IIB
Taxon_36	1.32560	10-PG-D9-65	NMDCN0000IIC
Taxon_36	1.32552	10-PG-D9-78	NMDCN0000IID
Taxon_368	1.32545	9_P_D3_57	NMDCN0000IIE
Taxon_368	1.32400	HP_D35_63	NMDCN0000IIF
Taxon_368	1.31724	EE-D2-10	NMDCN0000IIG
Taxon_368	1.32644	p8-95-9-AT-PN	NMDCN0000IIH
Taxon_368	1.32583	9-GN-D9-15	NMDCN0000III
Taxon_150	1.32558	9-AT-GN-D9-6	NMDCN0000IIJ
Taxon_150	1.32675	ban1-GN-KB2-D5-24	NMDCN0000IIK
Taxon_150	1.31948	CP-D15-Y-96	NMDCN0000IIL
Taxon_380	1.32322	YS1-D2-15	NMDCN0000IIM
Taxon_380	1.31997	CN-41	NMDCN0000IIN
Taxon_381	1.31898	EG-D1-80	NMDCN0000IIO
Taxon_381	1.32521	ban1-6101-FNS-D20-22	NMDCN0000IIP
Taxon_381	1.32548	CN-137	NMDCN0000IIQ
Taxon_381	1.31801	MBEF-MGAM-D3-50	NMDCN0000IIR
Taxon_384	1.32317	BaN-d2-34	NMDCN0000IIS
Taxon_386	1.32411	CP-XJ-D3-49	NMDCN0000IIT
Taxon_386	1.32318	BaN-d2-38	NMDCN0000IIU
Taxon_386	1.31811	ZN-1669-D3-54	NMDCN0000IIV
Taxon_386	1.31812	ZN-1669-D3-90	NMDCN0000IJ0
Taxon_39	1.32549	10-PG-D9-71	NMDCN0000IJ1
Taxon_39	1.31292	2BLK-D2-10	NMDCN0000IJ2
Taxon_39	1.32404	4-CP1-AT-SP-D3-13	NMDCN0000IJ3
Taxon_39	1.32676	ban1-YN-KB2-D5-37	NMDCN0000IJ4
Taxon_393	1.31719	EE-D2-42	NMDCN0000IJ5
Taxon_394	1.32612	p4-3-X_9_D7	NMDCN0000IJ6
Taxon_394	1.32307	YM_DZP_D3_79.mj	NMDCN0000IJ7
Taxon_394	1.31311	OD3-10	NMDCN0000IJ8
Taxon_394	1.31471	1BLK_dy_D2_42	NMDCN0000IJ9
Taxon_394	1.31521	1_1MRS_DE_D3_54	NMDCN0000IJA
Taxon_394	1.32713	ban-4-W3XN-2	NMDCN0000IJB
Taxon_394	1.31551	2_AT_dy_D15_32	NMDCN0000IJC
Taxon_394	1.31831	5MBEF-MRS-D5-5	NMDCN0000IJD
Taxon_396	1.31917	M3-D20-13	NMDCN0000IJE
Taxon_396	1.31946	CP2-D15-2E-2	NMDCN0000IJF
Taxon_396	1.31558	9-PYG-DE-D4-53	NMDCN0000IJG
Taxon_396	1.32636	p4-5-X_9_D7	NMDCN0000IJH
Taxon_396	1.31800	MBEF-EE-D3-74	NMDCN0000IJI
Taxon_397	1.32696	ban1-PYG-W-D8-65	NMDCN0000IJJ
Taxon_397	1.32697	ban1-PYG-WN-D8-1	NMDCN0000IJK
Taxon_397	1.32718	ban1-V-X-D5-49	NMDCN0000IJL
Taxon_397	1.31886	FG-D1-3	NMDCN0000IJM
Taxon_399	1.31362	GAMB_D4_81	NMDCN0000IJN
Taxon_399	1.31525	1_MRS_DE_D3_79	NMDCN0000IJO
Taxon_399	1.32716	Seq_2-PN-K-D15-4	NMDCN0000IJP
Taxon_399	1.32571	CC-29	NMDCN0000IJQ
Taxon_399	1.31315	OD3-32	NMDCN0000IJR
Taxon_399	1.31544	9-NA-DE-D4-21	NMDCN0000IJS
Taxon_399	1.32692	ban1-XN-KB1-D5-12	NMDCN0000IJT
Taxon_40	1.31612	2-DE-D30-93	NMDCN0000IJU
Taxon_40	1.31548	3_B1K_dyB_D15_13	NMDCN0000IJV
Taxon_40	1.31577	3_B1K_dyB_D15_7	NMDCN0000IK0
Taxon_400	1.31994	CP_2E_77.mj	NMDCN0000IK1
Taxon_400	1.31316	OD3-47	NMDCN0000IK2
Taxon_400	1.31517	1_1MRS_DE_D3_12	NMDCN0000IK3
Taxon_404	1.31654	4GAM-DE-D20-36	NMDCN0000IK4
Taxon_44	1.31627	2-DE-D30-14	NMDCN0000IK5
Taxon_45	1.31299	2SK-D2-44	NMDCN0000IK6
Taxon_45	1.31300	2SK-D2-47	NMDCN0000IK7
Taxon_45	1.31307	3BLK-D2-60	NMDCN0000IK8
Taxon_45	1.31308	3BLK-D2-81	NMDCN0000IK9
Taxon_45	1.31455	3SK-D55-32	NMDCN0000IKA
Taxon_48	1.31571	9-PYG-DE-D4-38	NMDCN0000IKB
Taxon_49	1.31634	2-PYGF-D20-DE-71	NMDCN0000IKC
Taxon_5	1.32646	9H-D20-55	NMDCN0000IKD
Taxon_5	1.32657	ATB-D20-Y-66	NMDCN0000IKE
Taxon_5	1.32585	p3-16-X-YH-D7	NMDCN0000IKF
Taxon_51	1.32714	ban2-47-KS-YN	NMDCN0000IKG
Taxon_51	1.32678	ban3-GN-KA2-D5-29	NMDCN0000IKH
Taxon_51	1.31944	CP_GN_D16_41	NMDCN0000IKI
Taxon_51	1.31942	CP1_D15_12	NMDCN0000IKJ
Taxon_51	1.31995	YM-2216E-D3-93	NMDCN0000IKK
Taxon_261	1.31646	2PAT-DE-D5-41	NMDCN0000IKL
Taxon_261	1.32742	ban3-VA-PN-D5-18	NMDCN0000IKM
Taxon_53	1.32621	p3-33-X-ATB-G-D5	NMDCN0000IKN
Taxon_54	1.32639	p6-35-9-AT-PN	NMDCN0000IKO
Taxon_54	1.31805	ZN-AT-D3-24	NMDCN0000IKP
Taxon_55	1.32602	p5-47-X-ATC-Y-D5	NMDCN0000IKQ
Taxon_56	1.32326	GNSAT-D2-7	NMDCN0000IKR
Taxon_56	1.31824	MBEF-D10-31	NMDCN0000IKS
Taxon_58	1.31371	FABB_D9_44	NMDCN0000IKT
Taxon_65	1.32782	ban3-VA-XN-D5-23	NMDCN0000IKU
Taxon_65	1.32623	p2-46-X-ATA-9-D5	NMDCN0000IKV
Taxon_65	1.32622	p5-42-X-ATC-Y-D5	NMDCN0000IL0
Taxon_67	1.31728	1bb-D4-44	NMDCN0000IL1
Taxon_68	1.31381	1AT-D30-5	NMDCN0000IL2
Taxon_69	1.31326	1AT-D10-4	NMDCN0000IL3
Taxon_69	1.31333	1AT-D10-47	NMDCN0000IL4
Taxon_69	1.31334	1AT-D10-49	NMDCN0000IL5
Taxon_7	1.32792	11-X-1-E1	NMDCN0000IL6
Taxon_7	1.32587	p3-13-X-YH-D7	NMDCN0000IL7
Taxon_7	1.32648	YH-D20-53	NMDCN0000IL8
Taxon_74	1.32617	p4-18-X-ATB-Y-D5	NMDCN0000IL9
Taxon_77	1.32740	ban1-2-KSAT10-0-PN	NMDCN0000ILA
Taxon_77	1.32759	ban1-8-KSAT10-0-PN	NMDCN0000ILB
Taxon_78	1.32780	ban3-VA-XN-D5-18	NMDCN0000ILC
Taxon_79	1.31273	27_63	NMDCN0000ILD
Taxon_8	1.31325	1AT-D10-1	NMDCN0000ILE
Taxon_8	1.32647	9H-D20-72	NMDCN0000ILF
Taxon_80	1.32601	p1-10-X-ATA-G-D5	NMDCN0000ILG
Taxon_80	1.32600	p7-19-X-ATD-G-D5	NMDCN0000ILH
Taxon_80	1.32629	p7-21-X-ATD-G-D5	NMDCN0000ILI
Taxon_82	1.31807	ZN-AT-D3-21	NMDCN0000ILJ
Taxon_84	1.31358	FAT_D4_9	NMDCN0000ILK
Taxon_85	1.31622	1AT-dyB-D15-34	NMDCN0000ILL
Taxon_85	1.31613	2BLK_dy_D6_45	NMDCN0000ILM
Taxon_85	1.32791	3-X-3-F11	NMDCN0000ILN
Taxon_85	1.32760	ban2-20-KS-XN	NMDCN0000ILO
Taxon_85	1.32593	p8-17-X-ATD-Y-D5	NMDCN0000ILP
Taxon_85	1.32594	p8-47-X-T-D5	NMDCN0000ILQ
Taxon_88	1.31630	1PAT-DE-D5-36	NMDCN0000ILR
Taxon_88	1.32556	9-AT-GN-D9-34	NMDCN0000ILS
Taxon_88	1.32777	ban3-VA-PN-D5-2	NMDCN0000ILT
Taxon_89	1.32663	ATD-Y-33	NMDCN0000ILU
Taxon_89	1.32596	p1-47-X-ATA-Y-D5	NMDCN0000ILV
Taxon_89	1.32598	p4-20-X-ATB-Y-D5	NMDCN0000IM0
Taxon_89	1.32597	p5-48-X-ATC-Y-D5	NMDCN0000IM1
Taxon_89	1.32628	p8-32-X-ATD-Y-D5	NMDCN0000IM2
Taxon_9	1.32664	ATD-Y-38	NMDCN0000IM3
Taxon_9	1.32590	p8-20-X-ATD-Y-D5	NMDCN0000IM4
Taxon_93	1.31335	1AT-D10-70	NMDCN0000IM5
Taxon_93	1.31579	3_B1K_dyB_D15_44	NMDCN0000IM6
Taxon_97	1.31514	4AT_dy_D2_5	NMDCN0000IM7
Taxon_97	1.32569	9-YN-D5-6	NMDCN0000IM8
Taxon_97	1.32688	ban2-YN-W3-D5-7	NMDCN0000IM9
Taxon_97	1.32711	ban3-KA3GN-10	NMDCN0000IMA
Taxon_98	1.31288	1AT-D2-47	NMDCN0000IMB
Taxon_98	1.31290	1AT-D2-69	NMDCN0000IMC
Taxon_98	1.31356	FAT_D4_4	NMDCN0000IMD
Taxon_98	1.32467	New40	NMDCN0000IME
Taxon_99	1.32793	13-X-1-G2	NMDCN0000IMF
Taxon_99	1.31337	1AT-D10-79	NMDCN0000IMG
Taxon_99	1.32627	p8-30-X-ATD-Y-D5	NMDCN0000IMH
