# Supplementary material for: Enlightening the Taxonomy Darkness of Human Gut Microbiomes With a Cultured Biobank
Source: Research Square preprint supplement (doi:10.21203/rs.3.rs-168279/v1), 2021-02-08
Supplement: Supplementary file 2 [file e10b7e843876ecfe1e98accd.xlsx]

## Sheet: Sheet1
Table S6. The quality and assembly information of hGMB genomes
Taxon_ID	Taxonomy	Genome_ID	NCBI accession of genome	NMDC accession of genome	Average coverage depth	N50 of contigs	Number of contigs	Completeness of genome	Contamination of genome	Estimated quality score of genome	Is 16S rRNA gene extracted from genome?
Taxon_1	Yeguia hominis	NSJ-40	JACRSN000000000	NMDC60014001	617.398	145706	74	98.66	0	98.66	Yes
Taxon_2	Luoshenia tenuis	NSJ-44	JACRSO000000000	NMDC60014002	433.378	533060	11	99.19	0.81	95.14	Yes
Taxon_3	Feifania hominis	BX7	JACRSP000000000	NMDC60014003	972.656	733821	13	96.64	0.67	93.29	Yes
Taxon_4	Bianquea renquensis	NSJ-32	JACRSQ000000000	NMDC60014004	468.881	124561	112	100	1.57	92.15	Yes
Taxon_5	Gehongia tenuis	NSJ-53	JACRSR000000000	NMDC60014005	904.135	1217822	14	100	0.81	95.95	Yes
Taxon_6	Guopingia tenuis	NSJ-63	JACRSS000000000	NMDC60014006	1233.9	322608	10	97.9	0.93	93.25	Yes
Taxon_7	Ligaoa zhengdingensis	NSJ-31	JACRST000000000	NMDC60014007	606.506	101557	113	99.33	0	99.33	Yes
Taxon_8	Congzhengia minquanensis	H8	JACRSU000000000	NMDC60014008	1251.49	568282	19	97.32	0	97.32	Yes
Taxon_9	Fumia xinanensis	NSJ-33	JACRSV000000000	NMDC60014009	559.498	661839	13	98.32	0	98.32	Yes
Taxon_10	Wujia chipingensis	NSJ-4	CP060632	NMDC60014010	784.166	2942917	1	98.66	0	98.66	Yes
Taxon_11	Simiaoa sunii	NSJ-8	CP060633	NMDC60014011	538.443	3572951	1	99.52	1.93	89.87	Yes
Taxon_12	Simiaoa hominis	H15	submitted	NMDC60014012	581.133	354559	44	98.39	3.24	82.19	Yes
Taxon_13	Jutongia hominis	BX3	JACRSW000000000	NMDC60014013	549.334	181819	41	88.59	0	88.59	No
Taxon_14	Jutongia huaianensis	NSJ-37	JACRSX000000000	NMDC60014014	498.185	158024	56	98.66	0	98.66	Yes
Taxon_15	Qiania dongpingensis	NSJ-38	CP060634	NMDC60014015	6069.65	3084832	1	98.52	0	98.52	Yes
Taxon_16	Zhenhengia yiwuensis	NSJ-12	JACRSY000000000	NMDC60014016	329.275	102100	143	97.99	4.59	75.04	Yes
Taxon_17	Jingyaoa shaoxingensis	NSJ-46	JACRSZ000000000	NMDC60014017	410.5	172003	71	99.37	0	99.37	Yes
Taxon_18	Wansuia hejianensis	NSJ-29	CP060635	NMDC60014018	332.332	3949724	1	99.37	0.32	97.77	Yes
Taxon_19	Zhenpiania hominis	BX12	JACRYT000000000	NMDC60014019	382.395	145981	71	99.29	0.71	95.74	Yes
Taxon_20	Lentihominibacter faecis	BX16	JACRWC000000000	NMDC60014020	252.45	23786	119	94.29	1.65	86.04	Yes
Taxon_21	Lentihominibacter hominis	NSJ-24	JACRTA000000000	NMDC60014021	708.662	591350	6	98.23	0.71	94.68	Yes
Taxon_22	Yanshouia hominis	BX1	JACRTB000000000	NMDC60014022	452.737	120863	92	98.66	0.67	95.31	Yes
Taxon_23	Shuzhengia hominis	BX18	submitted	NMDC60014023	91.23	6560	279	83.05	0.73	79.4	No
Taxon_24	Anaerofilum hominis	BX8	JACONZ000000000	NMDC60014024	813.383	785741	16	97.96	0	97.96	Yes
Taxon_25	Zongyangia hominis	NSJ-54	JACRTC000000000	NMDC60014025	2809.53	285416	24	99.33	0.67	95.98	Yes
Taxon_26	Youxingia wuxianensis	NSJ-64	JACRTD000000000	NMDC60014026	289.803	305551	34	98.66	0	98.66	Yes
Taxon_27	Qingrenia yutianensis	NSJ-50	JACRTE000000000	NMDC60014027	824.695	204914	116	97.99	0.17	97.14	Yes
Taxon_28	Jilunia laotingensis	N12	JACRTF000000000	NMDC60014028	371.093	4686566	4	98.88	0.37	97.03	Yes
Taxon_29	Paratissierella segnis	BX21	JACRTG000000000	NMDC60014029	979.692	123552	34	96.5	2.33	84.85	Yes
Taxon_30	Bittarella massiliensis	NSJ-19	JACMSD000000000	NMDC60014030	433.596	394316	27	94.63	0	94.63	Yes
Taxon_32	Eggerthella hominis	NSJ-70	JACOOA000000000	NMDC60014031	135.524	450289	24	100	0	100	Yes
Taxon_33	Gordonibacter massiliensis	NSJ-58	JACMSE000000000	NMDC60014032	452.237	255122	31	100	0.2	99	Yes
Taxon_35	Bacteroides multiformis	L5	submitted	NMDC60014034	508.062	349769	54	97.64	0.37	95.79	No
Taxon_36	Bacteroides facilis	NSJ-77	CP060488	NMDC60014035	239.453	6745934	1	99.51	0.11	98.96	Yes
Taxon_38	Bacteroides difficilis	NSJ-74	JACOOE000000000	NMDC60014037	159.346	438952	60	94.34	1.36	87.54	Yes
Taxon_39	Bacteroides hominis	NSJ-2	JACOOF000000000	NMDC60014038	835.843	294900	41	99.26	0	99.26	Yes
Taxon_40	Bacteroides parvus	NSJ-21	JACOOG000000000	NMDC60014039	362.857	4123809	2	99.26	0	99.26	Yes
Taxon_41	Barnesiella faecis	BX6	submitted	NMDC60014105	339.84	111075	108	99.59	0.77	95.74	No
Taxon_42	Butyricimonas hominis	NSJ-56	JACOOH000000000	NMDC60014040	320.935	548397	80	100	0	100	Yes
Taxon_43	Parabacteroides acidifaciens	426-9	JACRTI000000000	NMDC60014106	218.731	63244	161	99.62	0.19	98.67	Yes
Taxon_44	Parabacteroides segnis	BX2	JACOOI000000000	NMDC60014041	304.719	155561	117	99.62	0.19	98.67	Yes
Taxon_45	Parabacteroides hominis	NSJ-79	JACOOJ000000000	NMDC60014042	343.872	101257	117	99.42	0.51	96.87	Yes
Taxon_46	Alistipes hominis	New-7	JACOOK000000000	NMDC60014043	778.01	548031	20	100	0	100	Yes
Taxon_47	Ornithinibacillus hominis	BX22	JACOOL000000000	NMDC60014044	575.875	303458	29	100	0.88	95.6	Yes
Taxon_48	Streptococcus hominis	NSJ-17	JACOOM000000000	NMDC60014045	172.835	98019	44	100	0.09	99.55	Yes
Taxon_50	Christensenella tenuis	NSJ-35	JACOON000000000	NMDC60014047	423.217	367129	15	99.19	0.81	95.14	Yes
Taxon_51	Clostridium hominis	NSJ-6	JACOOO000000000	NMDC60014048	129.535	164721	52	95.7	3.27	79.35	Yes
Taxon_53	Clostridium lentum	NSJ-42	JACOOQ000000000	NMDC60014050	365.572	105234	56	99.17	0.16	98.37	Yes
Taxon_54	Clostridium facile	NSJ-27	JACOQK000000000	NMDC60014051	427.362	2737302	2	98.66	0	98.66	Yes
Taxon_55	Anaerosacchariphilus hominis	NSJ-68	JACOOR000000000	NMDC60014052	409.414	435241	32	99.37	0.63	96.22	Yes
Taxon_56	Anaerostipes hominis	NSJ-7	JACOOS000000000	NMDC60014053	442.071	128005	74	99.33	4.05	79.08	Yes
Taxon_57	Blautia massiliensis	4-46	JACOGH000000000	NMDC60014054	581.687	196236	43	99.37	0.32	97.77	Yes
Taxon_58	Blautia intestinalis	27-44	JACOQE000000000	NMDC60014055	459.822	391748	44	99.37	0	99.37	Yes
Taxon_59	Blautia segnis	BX17	JACOOT000000000	NMDC60014056	204.376	125114	40	96.2	0	96.2	No
Taxon_60	Blautia tarda	BX19	JACOQF000000000	NMDC60014057	257.404	117099	38	99.37	1.48	91.97	Yes
Taxon_61	Blautia celeris	NSJ-34	JACOOU000000000	NMDC60014058	355.739	353205	41	99.36	0	99.36	Yes
Taxon_62	Blautia lenta	M16	JACOOV000000000	NMDC60014059	409.201	124570	69	99.17	0.97	94.32	Yes
Taxon_63	Blautia difficilis	M29	JACOQG000000000	NMDC60014060	313.739	115134	106	99.37	0	99.37	Yes
Taxon_64	Clostridium segne	BX14	JACOOW000000000	NMDC60014061	435.116	274346	17	100	0	100	No
Taxon_65	Coprococcus hominis	NSJ-10	JACOOX000000000	NMDC60014062	443.265	520778	13	99.33	0	99.33	Yes
Taxon_66	Dorea hominis	NSJ-36	JACOOY000000000	NMDC60014063	478.933	177463	43	95.91	0	95.91	Yes
Taxon_67	Enterocloster hominis	BX10	JACRTJ000000000	NMDC60014064	663.819	150837	28	93.25	0	93.25	No
Taxon_68	Eubacterium segne	BX4	JACOOZ000000000	NMDC60014065	712.484	310274	19	99.33	0.67	95.98	Yes
Taxon_69	Eubacterium difficile	M5	submitted	NMDC60014066	117.203	74528	60	62.95	0	62.95	No
Taxon_70	Hungatella hominis	NSJ-66	JACOPB000000000	NMDC60014067	194.745	390347	80	99.37	1.74	90.67	Yes
Taxon_72	Lachnospira hominis	NSJ-43	JACOPD000000000	NMDC60014069	548.631	304140	30	97.99	0.67	94.64	Yes
Taxon_73	Ruminococcus hominis	NSJ-13	JACOPE000000000	NMDC60014070	266.667	3444226	3	98.83	0	98.83	Yes
Taxon_74	Mediterraneibacter hominis	NSJ-55	JACOPF000000000	NMDC60014071	1713.7	1956832	11	99.42	1.32	92.82	Yes
Taxon_75	Ruminococcus difficilis	M6	JAEQMG000000000	NMDC60014072	101.038	49007	203	89.8	0.34	88.1	Yes
Taxon_76	Roseburia lenta	NSJ-9	JACOPG000000000	NMDC60014073	2688.35	738110	11	98.43	0.97	93.58	Yes
Taxon_77	Roseburia yibonii	BX0805	JACOQH000000000	NMDC60014074	2110.3	260900	30	97.95	1.77	89.1	Yes
Taxon_78	Roseburia zhanii	BX1005	JACOPH000000000	NMDC60014075	1511.8	205828	105	99.03	2.5	86.53	Yes
Taxon_79	Roseburia rectibacter	NSJ-69	JACOPI000000000	NMDC60014076	498.67	157256	72	99.03	0.91	94.48	Yes
Taxon_80	Roseburia difficilis	NSJ-67	JACOPJ000000000	NMDC60014077	904.042	434417	11	99.37	0.63	96.22	No
Taxon_81	Agathobaculum hominis	M2	JACOPK000000000	NMDC60014078	684.196	260192	22	99.33	0.67	95.98	Yes
Taxon_82	Agathobaculum faecis	NSJ-28	JACOPL000000000	NMDC60014079	681.853	217543	84	99.33	0.34	97.63	Yes
Taxon_83	Anaerotruncus massiliensis	22A2-44	JACOIH000000000	NMDC60014080	358.631	105615	80	99.33	0.67	95.98	No
Taxon_84	Dysosmobacter segnis	BX15	JACOQI000000000	NMDC60014081	420.814	161262	128	98.66	0	98.66	Yes
Taxon_85	Dysosmobacter hominis	NSJ-60	JACOQJ000000000	NMDC60014082	678.407	299833	37	99.33	0	99.33	Yes
Taxon_86	Faecalibacterium hominis	4P_15	JACOPM000000000	NMDC60014083	341.764	358279	25	100	0	100	Yes
Taxon_87	Flintibacter faecis	BX5	JACOPN000000000	NMDC60014084	906.877	260387	42	99.33	0	99.33	Yes
Taxon_88	Flintibacter hominis	New-19	JACOPO000000000	NMDC60014085	688.6	360665	34	99.33	0	99.33	Yes
Taxon_89	Lawsonibacter hominis	NSJ-51	JACOPP000000000	NMDC60014086	1256.03	120007	115	98.99	0.67	95.64	Yes
Taxon_90	Lawsonibacter faecis	NSJ-52	JACOPQ000000000	NMDC60014087	421.825	251098	35	98.66	0.67	95.31	Yes
Taxon_91	Lawsonibacter celer	NSJ-47	JACOEA000000000	NMDC60014088	714.91	381885	17	99.33	0	99.33	Yes
Taxon_92	Neobittarella massiliensis	NSJ-65	JACOGI000000000	NMDC60014089	567.517	2009751	10	94.63	0	94.63	Yes
Taxon_93	Oscillibacter hominis	NSJ-62	CP060490	NMDC60014090	245.635	2823723	1	94.63	0	94.63	Yes
Taxon_94	Pseudoflavonifractor hominis	New-38	JACOPR000000000	NMDC60014091	560.905	501140	33	99.33	0	99.33	Yes
Taxon_95	Ruminococcus lentus	NSJ-14	JACOGJ000000000	NMDC60014092	419.529	89777	63	98.63	0	98.63	Yes
Taxon_96	Ruminococcus intestinalis	NSJ-71	JACOPS000000000	NMDC60014093	388.484	524443	19	98.66	0.34	96.96	Yes
Taxon_97	Paeniclostridium hominis	NSJ-45	JACRWD000000000	NMDC60014094	495.081	1618964	30	99.3	0	99.3	Yes
Taxon_98	Romboutsia faecis	NSJ-18	JACRWE000000000	NMDC60014107	506.311	570534	38	99.3	0.7	95.8	Yes
Taxon_99	Intestinimonas massiliensis	NSJ-30	submitted	NMDC60014095	701.534	3163611	1	99.33	0.67	95.98	Yes
Taxon_100	Hydrogeniiclostridium hominis	NSJ-41	submitted	NMDC60014096	223.22	380323	22	98.66	4.54	75.96	Yes
Taxon_101	Catenibacterium faecis	NSJ-22	JACRWG000000000	NMDC60014097	550.874	35266	161	100	0.61	96.95	Yes
Taxon_102	Eubacterium hominis	New-5	CP060636	NMDC60014098	354.726	3879051	1	93.4	2.19	82.45	Yes
Taxon_103	Holdemanella hominis	L34	JACRWH000000000	NMDC60014099	553.824	30548	144	98.11	1.52	90.51	Yes
Taxon_104	Megasphaera hominis	NSJ-59	JACOGK000000000	NMDC60014100	690.799	66727	85	100	0	100	Yes
Taxon_105	Veillonella hominis	NSJ-78	JACRWI000000000	NMDC60014101	940.576	258677	20	100	0	100	Yes
Taxon_106	Tissierella hominis	NSJ-26	JACRTK000000000	NMDC60014102	694.2	432768	12	99.3	0	99.3	Yes
Taxon_107	Fusobacterium hominis	NSJ-57	CP060637	NMDC60014103	501.579	2072767	1	98.88	1.12	93.28	Yes
Taxon_108	Escherichia hominis	NSJ-73	submitted	NMDC60014104	298.633	173586	114	99.62	0.41	97.57	Yes
Taxon_116	Bifidobacterium faecale	4-CP1-AT-SP-D3-35	JACRTS000000000	NMDC60014112	1359.08	1422868	26	100	0	100	Yes
Taxon_165	Parabacteroides faecis	3BLK-D2-90	JACRTM000000000	NMDC60014113	260.343	250020	36	98.08	0.19	97.13	Yes
Taxon_183	Bacillus crescens	OD3-11	JACRTT000000000	NMDC60014114	549.195	467098	27	99.59	0.02	99.49	Yes
Taxon_289	Terrisporobacter mayombei	ban5-GNNATD2-55	JACRYU000000000	NMDC60014115	739.044	106669	22	58.62	0	58.62	No
Taxon_328	Eubacterium tenue	GNFAT-D2-96	JACRTN000000000	NMDC60014116	713.459	167074	53	99.3	0	99.3	Yes
Taxon_331	Blautia faecis	3_YM_SP_D4_11.mj	JACRTO000000000	NMDC60014117	510.556	220581	73	99.37	0.02	99.27	Yes
Taxon_333	Blautia stercoris	3_YM_SP_D4_24.mj	JACRTP000000000	NMDC60014118	665.392	472868	28	99.36	0	99.36	Yes
Taxon_31	Massiliimalia timonensis	NSJ-15	JACRTL000000000	NMDC60014111	529.487	346732	18	98.66	0.13	98.01	Yes
Taxon_49	Streptococcus constellatus	NSJ-72	CP060489	NMDC60014046	1020.06	2014304	1	99	0.07	98.65	Yes
Taxon_71	Hungatella hominis	L36	JACOPC000000000	NMDC60014068	215.366	338347	70	99.37	2.22	88.27	Yes
Taxon_141	Bacteroides finegoldii	NSJ-39	JACOOB000000000	NMDC60014033	464.31	263329	84	93.5	0.07	93.15	Yes
Taxon_150	Bacteroides stercoris	NSJ-48	JACOOD000000000	NMDC60014036	259.993	92880	127	99.26	1.49	91.81	Yes
Taxon_261	Clostridium disporicum	NSJ-49	JACOOP000000000	NMDC60014049	250.197	58878	120	96.77	2.6	83.77	Yes
